# Supplementary material for: Creating a suprazyme: integrating a molecular enzyme mimic with a nanozyme for enhanced catalysis
Source: Royal Society of Chemistry journal article supplement (doi:10.1039/d4sc04577g), 2024-01-01
Supplement: d4sc04577g1.pdf [file d4sc04577g1.pdf]

## Supplementary Information

### Creating a suprazyme: integrating a molecular enzyme mimic with a nanozyme for enhanced catalysis

Pavlo Hyziuk,<sup>a</sup> Matteo Flaibani,<sup>b</sup> Paola Posocco,<sup>\*b</sup> and Volodymyr Sashuk<sup>\*a</sup>

<sup>a</sup> Institute of Physical Chemistry, Polish Academy of Sciences, Kasprzaka 44/52, 01-224 Warsaw, Poland

<sup>b</sup> Department of Engineering and Architecture, University of Trieste, 34127 Trieste, Italy

E-mail: [paola.posocco@dia.units.it](mailto:paola.posocco@dia.units.it), [vsashuk@ichf.edu.pl](mailto:vsashuk@ichf.edu.pl)

#### Table of Contents

|                                                   |     |
|---------------------------------------------------|-----|
| 1. General Information .....                      | S1  |
| 1.1 Experimental methods .....                    | S1  |
| 1.2 Computational methods .....                   | S2  |
| 2. Synthesis of aldehyde and oxime .....          | S5  |
| 3. Synthesis and functionalization of AuNPs ..... | S10 |
| 4. Characterization of AuNPs .....                | S11 |
| 5. pKa measurements .....                         | S14 |
| 6. Binding studies .....                          | S16 |
| 7. Kinetic studies .....                          | S17 |
| 8. Computational results .....                    | S22 |
| 9. Appendix .....                                 | S24 |
| 9.1 MD input files .....                          | S24 |
| 9.2 MD molecular starting structures .....        | S26 |
| 10. References .....                              | S33 |

#### 1. General Information

##### 1.1 Experimental methods

All chemicals were procured as reagent-grade materials from commercial suppliers, including Merck, TCI, and Thermo Fisher Scientific, and were utilized without additional purification. The solvents employed, sourced from Merck, ChemPur, and PoCh, met analytical-grade standards. Deuterated solvents were acquired from Armar Chemicals. Experiments were conducted at room temperature unless otherwise specified. NMR spectra were recorded on a Bruker 400 MHz instrument and analyzed using MestReNova software. Chemical shifts ( $\delta$ ) are reported in ppm relative to TMS, and coupling constants (J) are expressed in Hz.

Quartz cuvettes were obtained from Hellma Analytics. Absorbance spectra were recorded using the Evolution220 spectrophotometer from Thermo Fisher Scientific and analyzed with Origin software. Automatic mixing in the cuvette was facilitated using Peltier thermostating accessories from Thermo Fisher Scientific. High-resolution ESI mass spectra were recorded on a SYNAPT spectrometer, and TEM images were captured on an FEI TECNAI instrument, with analysis conducted using the ImageJ program. DLS data were obtained from Malvern Zetasizer. Thermogravimetric analysis (TGA) was performed using the Mettler Toledo TGA/DSC 3+ instrument. pH measurements were conducted using the HI 3220 pH Meter equipped with an InLab<sup>®</sup> Micro glass electrode from Mettler Toledo. Isothermal titration experiments were carried out on a Malvern MicroCal PEAQ-ITC at 25°C in deionized water obtained from a Milli-Q station with a resistivity of 18.3 M $\Omega$ -cm.

## 1.2 Computational methods

### *Atomistic models*

An icosahedron of gold (Au) atoms with a diameter of 2.5 nm was used as core of the nanoparticle (NP) model, with a material density of 19.3 g/cm<sup>3</sup> and a lattice constant of  $\sim$  0.41 nm, for a total of  $\sim$  309 gold atoms. A uniform distribution of MUS ligands was placed on the NP surface, using an amount of molecules matching the experimental chain density value (see section S4). The model was built using the Atomistic Simulation Environment (ASE)<sup>1</sup> set of tools and the mBuild<sup>2</sup> software. The parameters of the INTERFACE<sup>3</sup> force field for metals were used to describe the interactions between Au atoms, while the MUS ligand was parametrized according to the gaff2<sup>4</sup> force field. The parmchk2 software, available within the AMBER 22 suite of programs, was employed to test if all the parameters required for the MUS ligand were already available in the gaff2 force field. No missing parameters required an external derivation. The atomic partial charges of the molecule derived using the RED server, applying the RESP fitting method.<sup>5-9</sup> CB7 and aldehyde molecules were parametrized following the same procedure described for MUS ligands, with all parameters being already available in the gaff2 force field. A cubic box of water molecules (TIP3P) was placed around the system of interest using the *tleap* software of the AMBER 22<sup>10</sup> suite of programs, with at least 18 Å of solvent from each solute atom (average number of water molecules equal to  $\sim$  40000). Counterions were introduced when it was necessary to neutralize the system.

### *Molecular dynamics (MD) simulations of the AuMUS*

The AuMUS was simulated using the AMBER 22 suite of programs, exploiting the acceleration provided by the GPU (CUDA) version of the PMEMD engine<sup>11-13</sup> and replicated for three times. The solvated system was minimized in two steps, keeping all the solute atoms (nanoparticle and counterions) fixed in the first part of the procedure, allowing for the relaxation of the solvent molecules. A value of 10 Å was used as cutoff for the non-bonded interactions. The system was subsequently brought to the final simulation temperature of 300 K, slowly increasing the value in a 100 ps simulation performed in the canonical NVT ensemble (integration step of 1 fs). An equilibration stage of 10 ns at constant temperature and pressure (300 K and 1 atm) was performed using first the Berendsen barostat and then switching to the Monte Carlo barostat for 10 ns (integration step of 2 fs). The final production phase was performed in the NPT ensemble for 100 ns, employing the Monte Carlo barostat and applying the SHAKE algorithm to restrain the bonds involving hydrogen atoms. Periodic Boundary Conditions (PBC) were employed, computing the electrostatic interactions with the Particle Mesh

Ewald (PME) algorithm, considering the interactions below a cutoff of 10 Å. A restraint on the positions of the Au atoms and sulfurs of the thiol groups of the ligands was applied during the simulations, with a force constant of 200 kcal/mol · Å<sup>2</sup>. A restraint on the gold atoms was applied in all simulations involving the AuMUS nanoparticle.

#### *MD simulation of the CB7*

CB7 was simulated using the PMEMD engine, with PBC conditions and employing the PME algorithm to treat the electrostatic interactions, with a cutoff of 10 Å. The same cutoff was used for the non-bonded interactions. The crystallographic structure of CB7 was employed as the starting model, downloaded from the free available Protein Data Bank (PDB) <https://www.rcsb.org/> (PDB ID QQ7). The system was initially solvated with water molecules and then minimized in two stages: first, with the CB7 kept fixed, followed by a full minimization of the entire system. A heating step in the NVT ensemble was performed after the minimization, bringing the system to the final temperature of 300 K, in a simulation time of 100 ps (integration step of 1 fs). Before the final production phase, the system was equilibrated for 20 ns (integration step of 2 fs) at a constant temperature of 300 K and constant pressure of 1 atm, employing the Berendsen barostat for the first 10 ns and the Monte Carlo barostat for the last 10 ns of equilibration. The production phase was performed in the NPT ensemble for 100 ns, keeping the pressure constant with the Monte Carlo barostat. The bonds involving hydrogen atoms were restrained using the SHAKE algorithm. Three replicas were carried out.

#### *MD simulation of the aldehyde*

The PMEMD engine was employed to simulate the aldehyde with PBC conditions, handling the electrostatic and non-bonded interactions as described in the two previous paragraphs. Bonds involving hydrogen atoms were restrained with the SHAKE algorithm. The starting structure of the aldehyde molecule was created with a molecule editor. The system was solvated and neutralized with two counterions, followed by the minimization procedure described above, keeping both the aldehyde and counterions fixed in the first step. The final temperature of 300 K was reached with a 100 ps simulation (integration step of 1 fs) in the NVT ensemble, followed by an equilibration step in the NPT ensemble (integration step of 2 fs) before starting the final production of 100 ns. Three replicas were considered.

#### *CB7-aldehyde interaction*

The study of the host-guest complex was performed starting from the two equilibrated molecules, obtained from the MD simulations described above, and replicated three times. The substrate was manually inserted into the macrocycle, placing the aromatic ring inside the cavity. This choice was motivated by the hydrophobic nature of both the aromatic moiety and the CB7 cavity, allowing also for charge-dipole interaction between a charged group of the aldehyde with one carbonyl rim of the CB7. The complex was then solvated, neutralized with the addition of counterions, followed by the two-step minimization procedure reported in the previous paragraphs. The system was brought at the final temperature of 300 K in the NVT ensemble and subsequently equilibrated at constant temperature and pressure before the final production phase. The complex was simulated for 100 ns in the NPT ensemble, monitoring the aldehyde dynamics inside the macrocycle.

### *AuMUS-CB7 interaction*

The study of the interaction between the NP and CB7 was performed starting from their equilibrated molecular models, extrapolated from the MD simulations described above, and performed three times using three different initial structures. A single CB7 molecule was manually placed at a distance higher than the cutoff used for the non-bonded interactions, to avoid effects that could arise from the initial configuration. The system was then solvated and counterions were added to reach neutralization. After being minimized and equilibrated at the final temperature and pressure, the system underwent a simulation of 100 ns in the NPT ensemble before the subsequent addition of the next CB7 molecule; this procedure aimed to mimic a sequential binding process somehow similar to that occurring during ITC experiments. The system was again equilibrated and simulated in the NPT ensemble each time a macrocycle was added, allowing the system to relax. Simulations proceeded in this way until a total of 12 CB7 units was bound to the NP; this was the threshold beyond which any further addition would have required more user intervention, potentially rendering the resulting simulations susceptible to artifacts.

### *AuMUS-aldehyde interaction*

The study of the interaction between the NP and substrate was conducted employing their equilibrated structures, obtained from the MD simulations described above, and repeated three times. Aldehyde molecules were placed in a spherical layer around the NP using the PACKMOL software<sup>14</sup> in a number that corresponds to the experimental binding studies (see section S6). Preliminary MD runs and observables from ITC experiments suggested us that a computationally time-consuming stepwise approach to study AuMUS-aldehyde complexation was unnecessary.<sup>15</sup> After the addition of the aldehyde molecules the system was solvated and neutralized, with counterions to balance the negative and positive charge of ligands and aldehydes. The system was subsequently minimized and equilibrated at the final temperature and pressure before being simulated for 100 ns in the NPT ensemble, monitoring the behavior of the system.

### *CB7-aldehyde umbrella sampling calculations*

The binding free energy relative to the substrate-CB7 complexation was retrieved by means of umbrella sampling (US) calculations, extracting the substrate from the cavity of the CB7. The starting point was the equilibrated structure of the substrate-CB7 complex, to which a set of dummy atoms was added. These dummy atoms, whose positions were restrained during simulations with a force constant of  $100 \text{ kcal/mol} \cdot \text{\AA}^2$ , were employed as anchor points for sampling, allowing us to pull the aldehyde molecule out of the macrocycle along a straight line, thus studying the direct association process.<sup>16</sup> The distance between one dummy atom and the carbon atom of the carbonylic group of the aldehyde was chosen as single collective variable to monitor. A total of 95 windows were simulated, spanning from 2.85 to 49.85  $\text{\AA}$ , spaced by 0.50  $\text{\AA}$ . A constant of  $10 \text{ kcal/mol} \cdot \text{\AA}^2$  was used to define the harmonic potential. Every single window was simulated for a total of 1.5 ns, discarding the first 500 ps as equilibration. The simulations were performed in series, starting the simulation of each window from the last frame of the previous one. We employed the same parameters used for the MD simulations. The binding free energy was obtained from the free energy profile reconstructed using the Weighted Histogram Analysis Method (WHAM)<sup>17-20</sup> on three replica. The effect of the orientational restraint was accounted calculating the corresponding correction terms, as reported in literature.<sup>21,22</sup>

## AuMUS-CB7 umbrella sampling calculations

The free energy relative to binding of the macrocycle to the NP was calculated by means US calculations, pulling the CB7 away from the monolayer. As starting point, we selected CB7@B1s and CB7@B2s as detected from the unbiased MD calculations. Three replicas for each binding mode were averaged. The distance between the center of mass of the macrocycle and the nearest sulfur atom bound to the gold surface was chosen as single collective variable. The macrocycles were pulled away from the NP along a straight line, restraining the angle between the center of mass (COM) of the CB7, the chosen sulfur atom and the center of the NP, until a distance of 30 Å was reached. Approximately 45 windows, spaced by 0.5 Å, were sampled for each CB7, depending on the starting distance. A constant of 25 kcal/mol · Å<sup>2</sup> was employed for the harmonic potential restraining the distance, while a constant of 1000 kcal/mol · rad<sup>2</sup> was used to keep the angle fixed during the pulling. Every single window was simulated for a total of 2.5 ns, discarding the first 500 ps as equilibration.

## 2. Synthesis of aldehyde and oxime

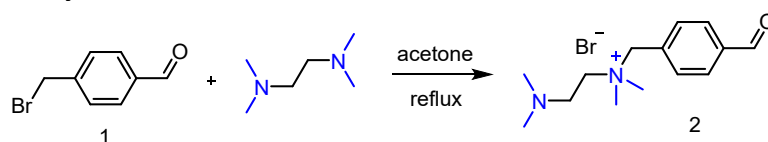

**2-(Dimethylamino)-N-(4-formylbenzyl)-N,N-dimethylethane-1-aminium bromide (2):** Compound **1**<sup>23</sup> (109 mg, 0.548 mmol) was dissolved in 2 mL of acetone. To this solution, 1,4-tetramethylenediamine (1.64 mL, 10.96 mmol) was added with stirring at room temperature. The reaction mixture was then refluxed overnight. Afterward, the solvent was concentrated under reduced pressure, yielding a pure off-white solid (163.1 mg, 94%) that was utilized in the subsequent stage. <sup>1</sup>H NMR (400 MHz, acetonitrile-*d*<sub>3</sub>): δ 10.09 (s, 1H), 8.05 – 7.99 (d, *J* = 8.2 Hz, 2H), 7.78 – 7.72 (d, *J* = 8.2 Hz, 2H), 4.65 (s, 2H), 3.47 – 3.41 (t, *J* = 6.0 Hz, 2H), 3.05 (s, 6H), 2.79 – 2.71 (t, *J* = 6.0 Hz, 2H), 2.25 (s, 6H). <sup>13</sup>C NMR (100 MHz, acetonitrile-*d*<sub>3</sub>): δ 192.41, 137.67, 134.11, 134.01, 129.7, 66.98, 61.35, 53.02, 49.84, 44.6. HRMS (ESI) *m/z*: calc. for C<sub>14</sub>H<sub>23</sub>N<sub>2</sub>O: 235.1810 [M]<sup>+</sup>; found: 235.1814.

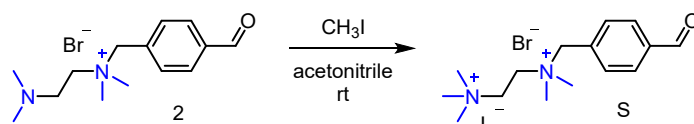

**N<sup>1</sup>-(4-formylbenzyl)-N<sup>1</sup>,N<sup>1</sup>,N<sup>2</sup>,N<sup>2</sup>,N<sup>2</sup>-pentamethylethane-1,2-diaminium bromide iodide (S):** Compound **2** (163.1 mg, 0.517 mmol) was dissolved in 3.5 mL of acetonitrile. To this solution, iodomethane (0.322 mL, 5.17 mmol) was added with stirring at room temperature. The reaction mixture was stirred overnight at room temperature. Afterward, the solvent was concentrated under reduced pressure. The resulting solid residue was redissolved in acetonitrile, and diethyl ether was introduced. The precipitate was collected by centrifugation, washed with diethyl ether (3x10 mL), and dried under vacuum to afford the target aldehyde **S** as an off-white powder (214 mg, 91% yield). <sup>1</sup>H NMR (400 MHz, acetonitrile-*d*<sub>3</sub>): δ 10.11 (s, 1H), 8.08 – 8.02 (d, *J* = 8.2 Hz, 2H), 7.87 (d, *J* = 8.2 Hz, 2H), 4.86 (s, 2H), 4.12 (s, 4H), 3.27 (s, 9H), 3.16 (s, 6H). <sup>13</sup>C NMR (100 MHz, acetonitrile-*d*<sub>3</sub>): δ 193.33, 139.06, 135.21, 133.59, 130.94, 68.55, 58.71, 57.60, 55.11, 51.38.

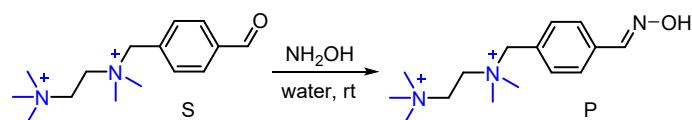

**N<sup>1</sup>-(4-((hydroxyimino)methyl)benzyl)-N<sup>1</sup>,N<sup>1</sup>,N<sup>2</sup>,N<sup>2</sup>,N<sup>2</sup>-pentamethylethane-1,2-diaminium bromide iodide (P):** The experiment was similar to UV-Vis studies (pH=6, 298 K) but conducted in deuterated water at increased concentrations of the substrate (2mM) and hydroxylamine (40 mM) to enable NMR measurements. <sup>1</sup>H NMR (400 MHz, acetonitrile-*d*<sub>3</sub>): δ 8.19 (s, 1H), 7.74 (d, *J* = 8.1 Hz, 2H), 7.66 (d, *J* = 8.1 Hz, 2H), 4.74 (s, 2H), 4.15 – 3.99 (m, 4H), 3.26 (s, 9H), 3.13 (s, 6H). <sup>13</sup>C NMR (100 MHz, acetonitrile-*d*<sub>3</sub>): δ 149.27, 136.61, 134.71, 128.60, 128.31, 69.34, 58.72, 57.21, 55.10, 51.21.

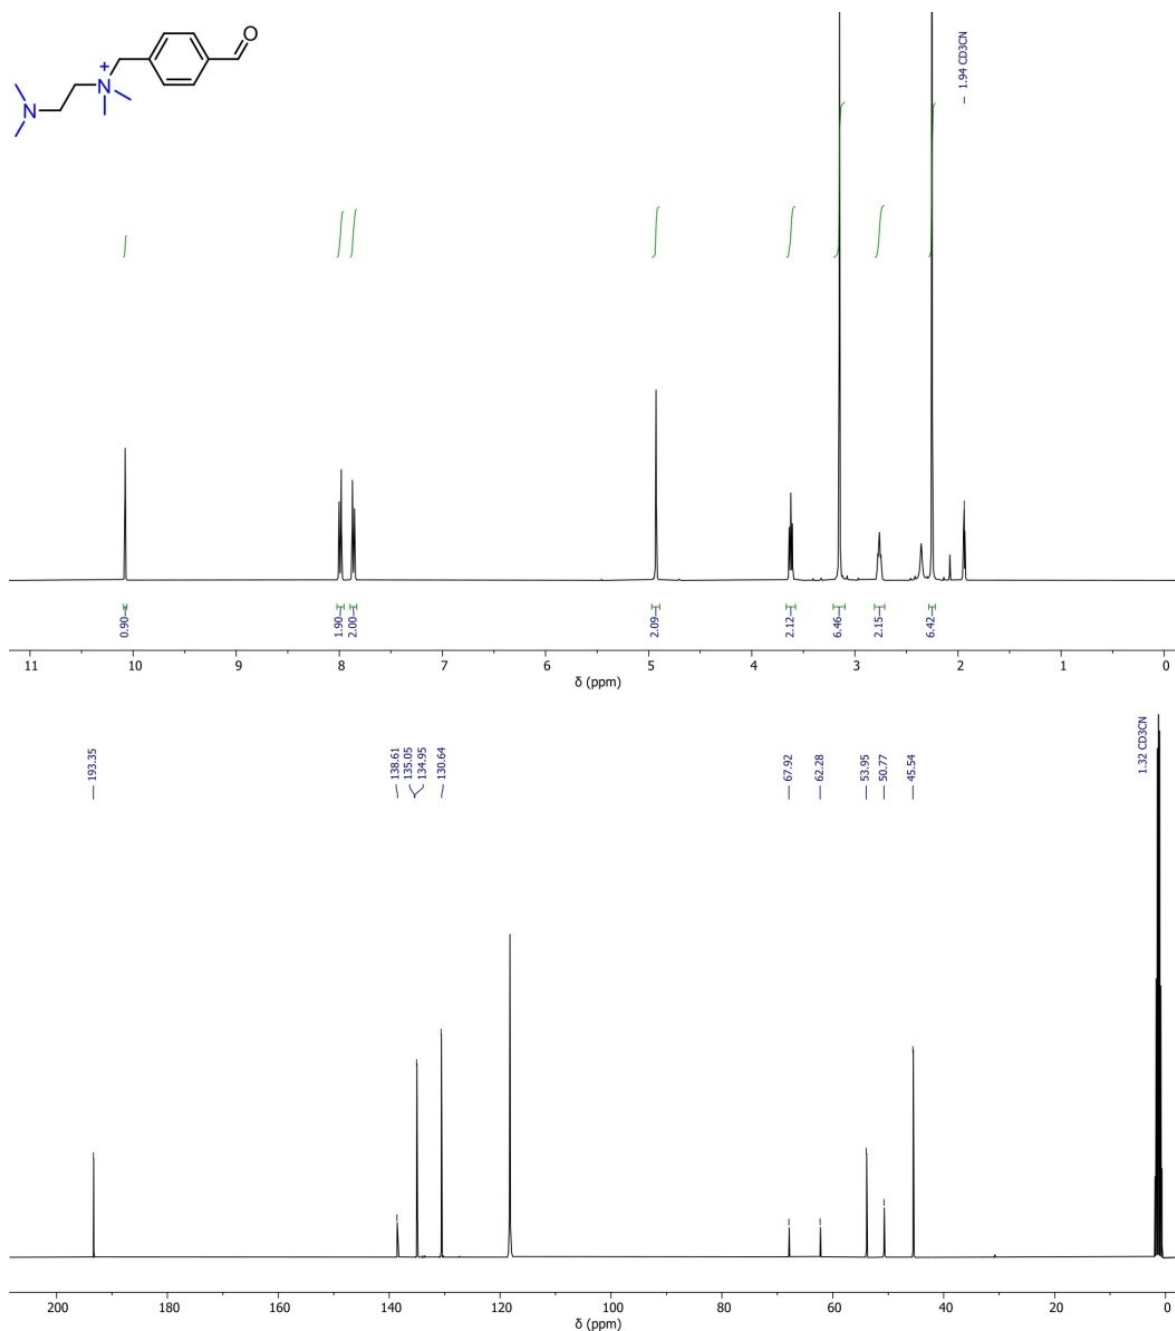

Fig. S1 <sup>1</sup>H and <sup>13</sup>C NMR spectra of **2** in CD<sub>3</sub>CN at 298 K.

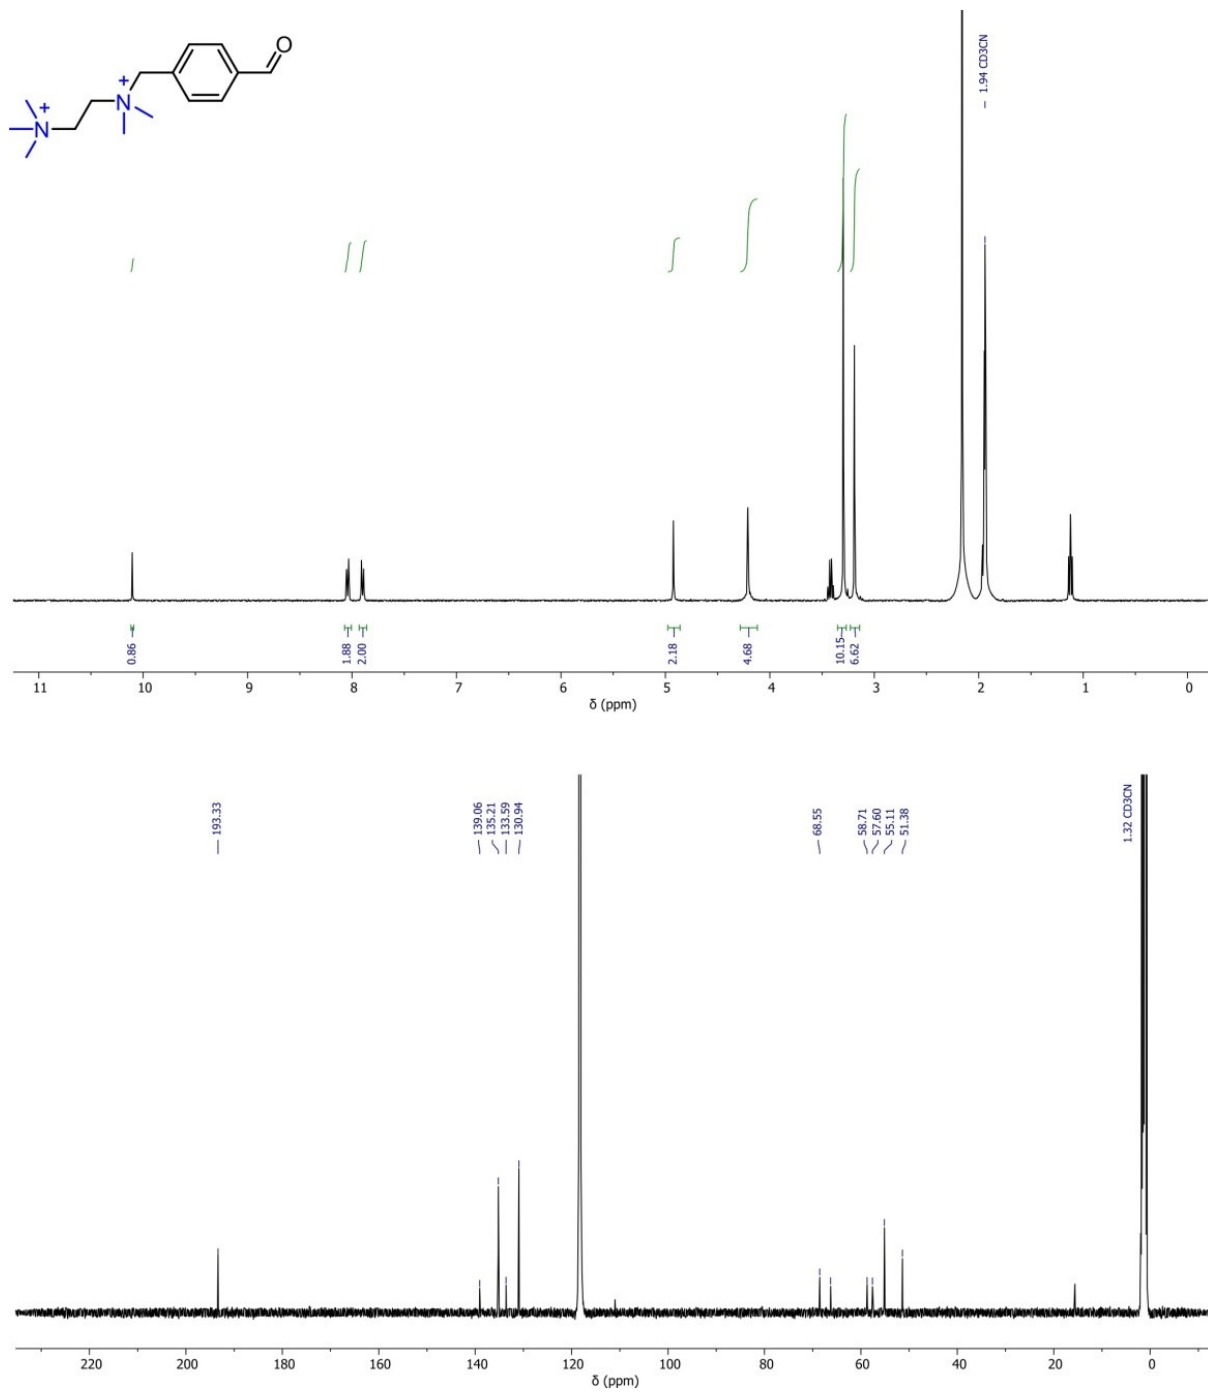

Fig. S2 <sup>1</sup>H and <sup>13</sup>C NMR spectra of **S** in CD<sub>3</sub>CN at 298 K.

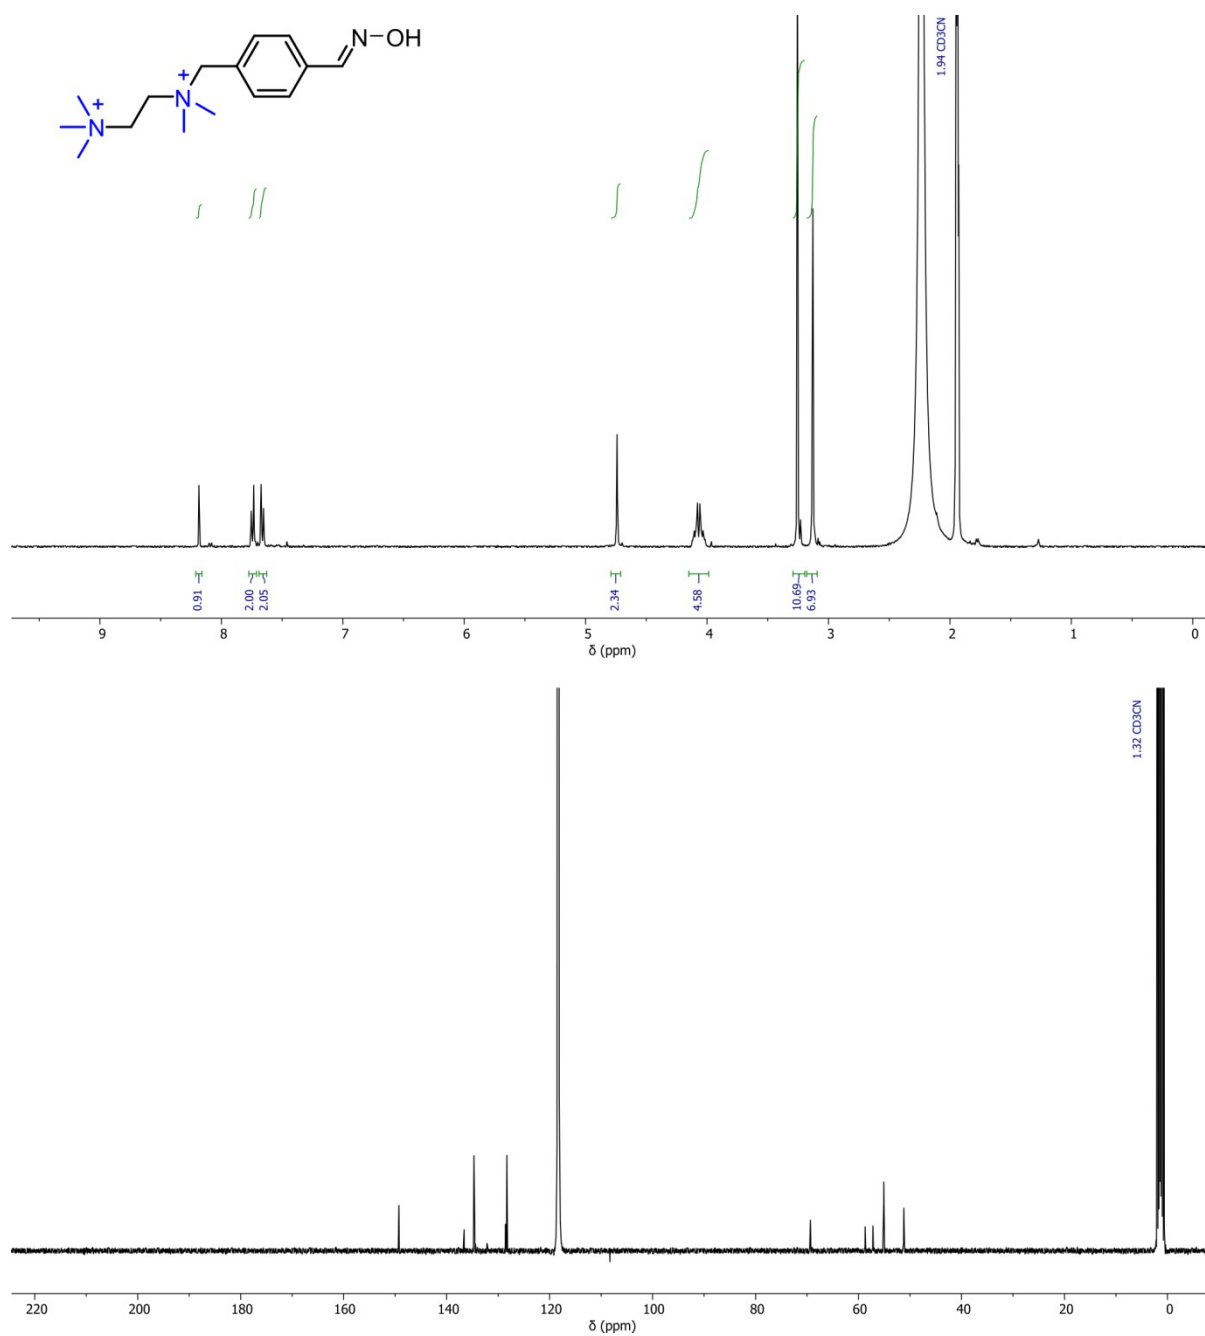

Fig. S3  $^1\text{H}$  and  $^{13}\text{C}$  NMR spectra of **P** in  $\text{CD}_3\text{CN}$  at 298 K.



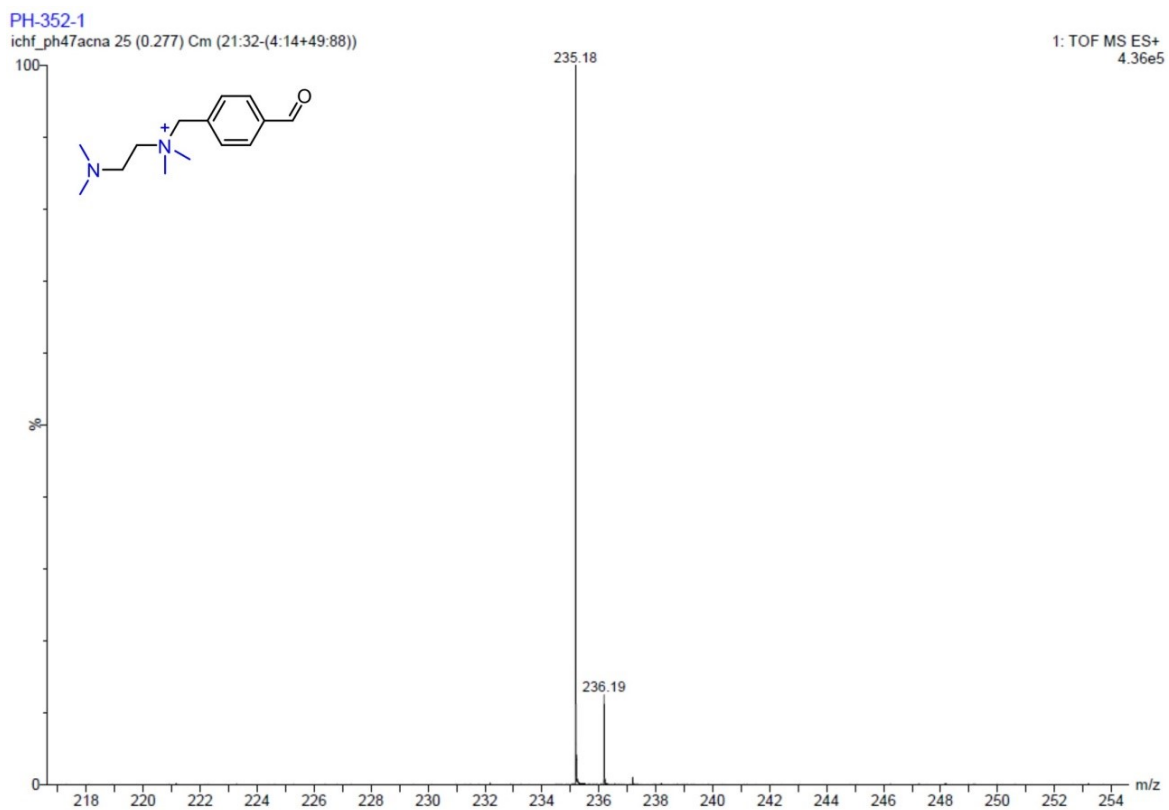

Fig. S4 Mass spectrum of **2** under electrospray ionization in positive ion mode.

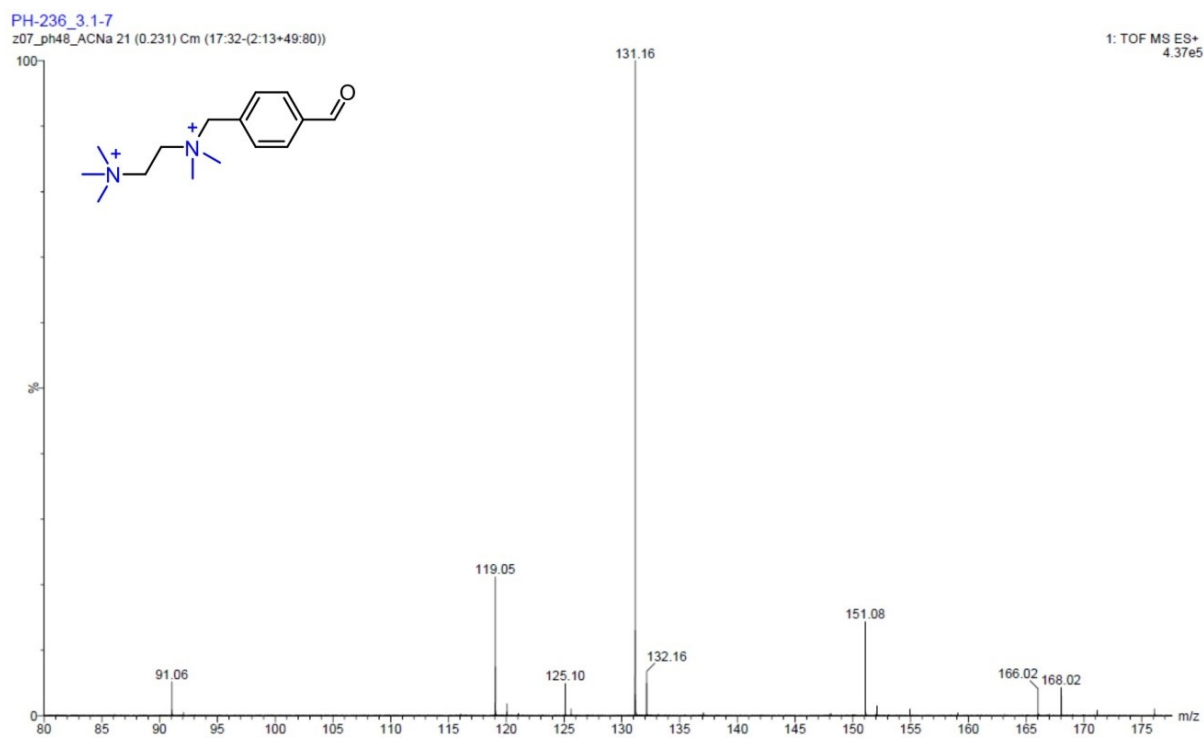

Fig. S5 Mass spectrum of **5** under electrospray ionization in positive ion mode.

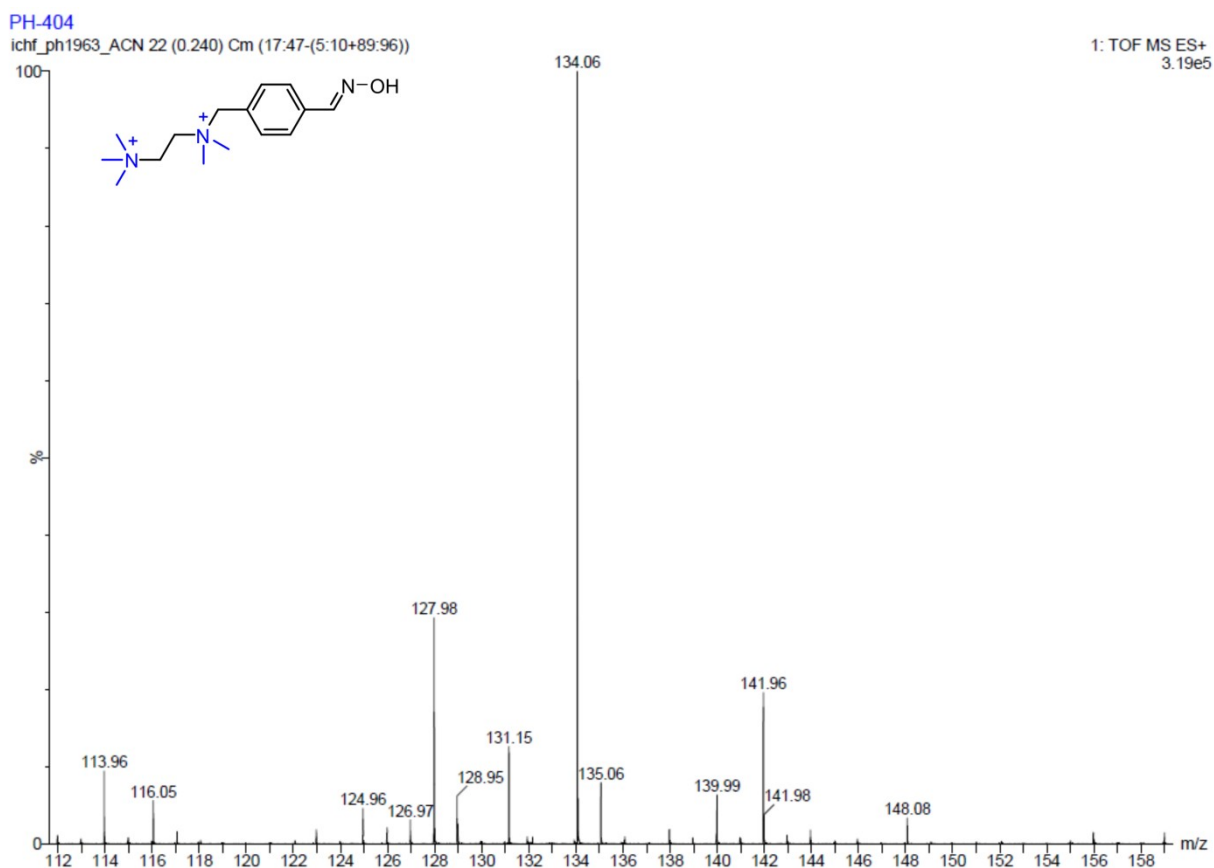

Fig. S6 Mass spectrum of **P** under electrospray ionization in positive ion mode.

### 3. Synthesis and functionalization of AuNPs

#### *Synthesis of thiol-coated AuNPs (AuMUS, AuTMA, AuPEG)*

HAuCl<sub>4</sub>·3H<sub>2</sub>O (9.75 mg, 0.025 mmol) together with dodecylamine (90 mg, 0.486 mmol) were dissolved in 2.5 mL of 0.1M didodecyldimethylammonium bromide (DDAB) toluene solution, and reduced by adding tetrabutylammonium borohydride (25 mg dissolved in 1 ml of 0.1M DDAB toluene solution) in a single portion under vigorous stirring. The resulting mixture was stirred for 1.5 hours. Subsequently, 10.5 mL of methanol was added, and precipitated gold nanoparticles (AuNPs) were collected by centrifugation at 1000 RPM.

The AuNPs dissolved in chloroform (3.5 mL) were added dropwise to a solution of the ligand, either MUS<sup>24</sup> (3.43 mg, 0.012 mmol) or TMA<sup>25</sup> (1.86 mg, 0.007 mmol), in methanol (7 mL) with vigorous stirring. In the case of the PEG<sup>26</sup> ligand (5.26 mg, 0.025 mmol), the procedure was similar, except chloroform (2 mL) was used instead of methanol. The resulting mixture was stirred for an additional 1.5 hours.

#### *Purification of AuMUS*

AuMUS NPs were collected by centrifugation and washed with methanol (3x5 mL). Finally, the NP sediment was dried and then redispersed in 951  $\mu\text{L}$  of deionized water or heavy water, resulting in a 21.44 mM (in terms of gold atoms) NP dispersion.

#### *Purification of AuPEG*

AuTMA NPs were precipitated by pouring the reaction mixture into pentane (7 ml) and collected by centrifugation. The NP sediment was redispersed in  $\text{CH}_3\text{OH}$  (100  $\mu\text{L}$ ), precipitated by pentane (7 mL) and centrifuged. The procedure was repeated two times. Finally, the NPs were dried and redispersed in 1.371 mL of deionized water to give 15.32 mM (in terms of gold) NP dispersion.

#### *Purification of AuPEG*

AuPEG NPs were precipitated by pouring the reaction mixture into pentane (15 ml) and collected by centrifugation. The NP sediment was redispersed in  $\text{CHCl}_3$  (1 mL), precipitated by pentane (15 mL) and centrifuged. The procedure was repeated two times. Finally, the NPs were dried and redispersed in 1.233 mL of deionized water to give 15.68 mM (in terms of gold) NP dispersion.

### 4. Characterization of AuNPs

#### *Sample preparation for TEM*

AuMUS dispersions were dropcast onto 300 mesh Cu grids and analyzed using TEM.

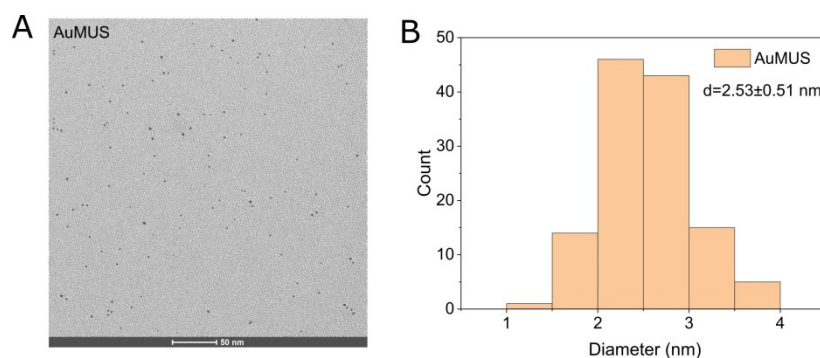

Fig. S7 TEM micrograph and size analysis of AuMUS.

#### *Sample preparation for TGA*

AuMUS, AuTMA and AuPEG dispersions were transferred to ceramic crucibles, dried and subjected to TGA.

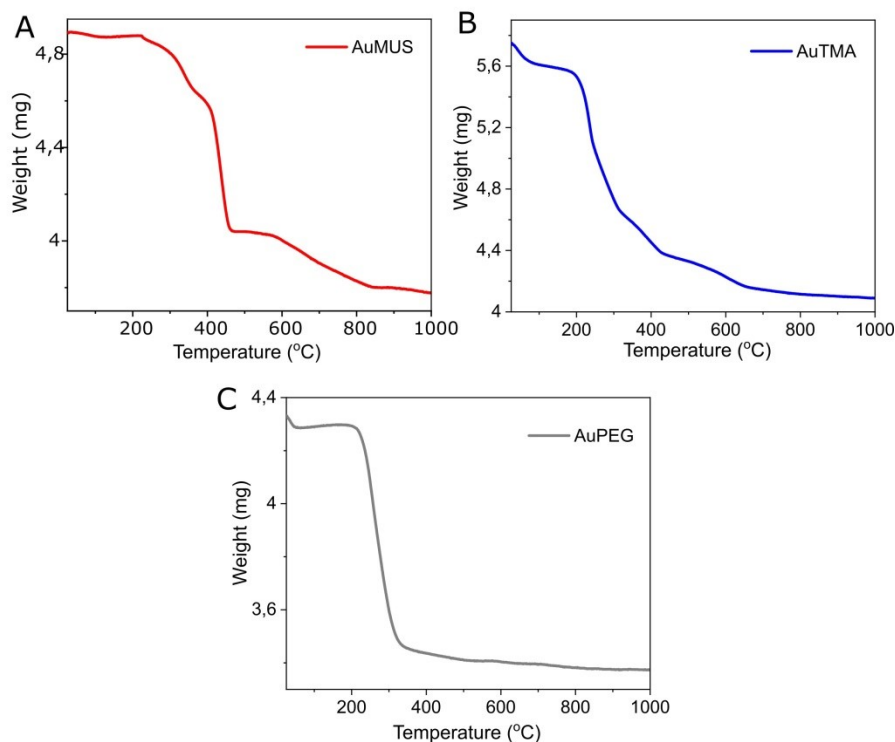

Fig. S8 Thermograms of AuNPs coated with MUS (A), TMA (B) and PEG (C) monolayers.

### Ligand shell quantification

The ligand density ( $\rho_{lig}$ ) can be calculated by dividing the total number of ligands ( $N_{lig}$ ) by the total surface area of gold nanoparticles ( $S_{total}$ ) using the formula:

$$\rho_{lig} = \frac{N_{lig}}{S_{total}}$$

The total number of ligands ( $N_{lig}$ ) can be determined from:

$$N_{lig} = \frac{m_{lig}}{M_{lig}} \cdot N_a$$

where  $m_{lig}$  is the total mass of adsorbed ligands (equal to the total weight loss during TGA),  $M_{lig}$  is the molecular weight of the ligand, and  $N_a$  is Avogadro's number.

The total area of gold nanoparticles ( $S_{total}$ ) can be estimated from:

$$S_{total} = S_{AuNP} N_{total}$$

where  $S_{AuNP}$  is the surface area of a single nanoparticle, given by:

$$S_{AuNP} = 4\pi r_{AuNP}^2$$

and  $N_{total}$  is the total number of nanoparticles calculated using the formula for the volume of a sphere:

$$V_{AuNP} = \frac{4}{3}\pi r_{AuNP}^3,$$

where  $r_{AuNP}$  ( $\approx 1.27 \text{ nm}$ ) is the average radius of the gold core

the mass of a single nanoparticle ( $m_{AuNP}$ ):

$$m_{AuNP} = \rho_{Au} V_{AuNP} = \rho_{Au} \frac{4}{3}\pi r_{AuNP}^3,$$

where  $\rho_{Au} = 19.3 \text{ g/cm}^3$  is the density of gold

and the weight of the sample after TGA ( $m_{total}$ ):

$$N_{total} = \frac{m_{total}}{m_{AuNP}} = \frac{3m_{total}}{4\rho_{Au}\pi r_{AuNP}^3}$$

To determine the number of ligands per single nanoparticle, the total number of ligands ( $N_{lig}$ ) was divided by the total number of gold nanoparticles ( $N_{total}$ ):

$$N_{lig}(\text{per single AuNP}) = \frac{N_{lig}}{N_{total}}$$

Table S1. Calculated ligand densities and quantities.

| Sample | $\rho_{lig}$ , molecules/nm <sup>2</sup> | $N_{lig}$ (per single AuNP) |
|--------|------------------------------------------|-----------------------------|
| AuMUS  | 4.7                                      | 96                          |
| AuTMA  | 6.6                                      | 133                         |
| AuPEG  | 6.4                                      | 129                         |

## 5. pKa measurements

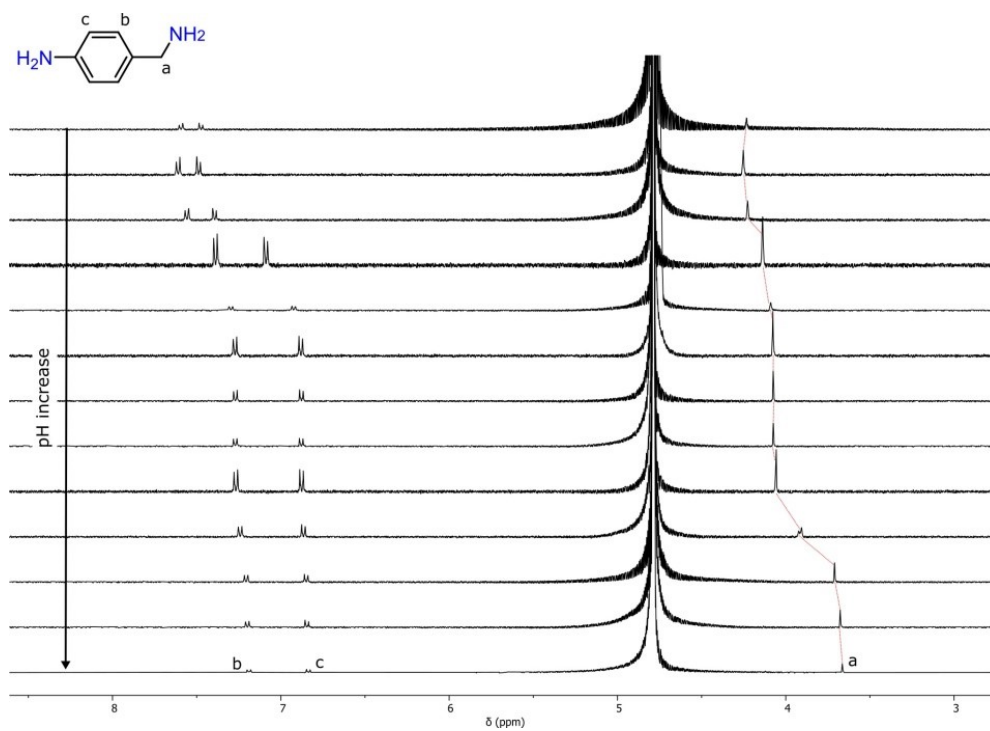

Fig. S9 <sup>1</sup>H NMR spectra of 4-aminobenzylamine at various pH<sub>obs</sub> (D<sub>2</sub>O, 298 K).

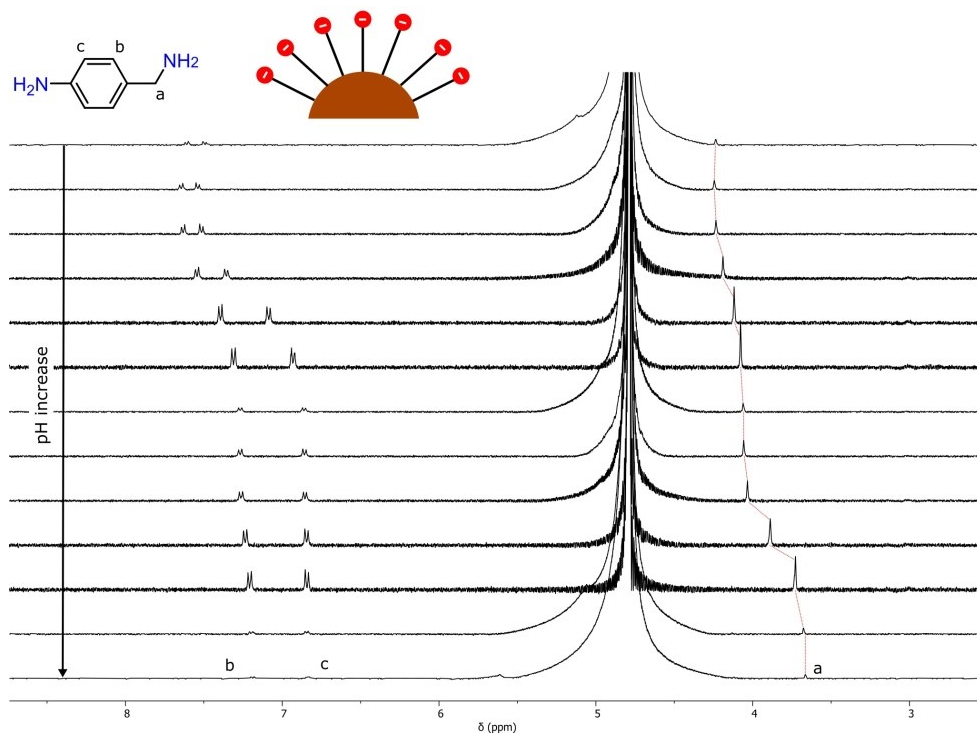

Fig. S10  $^1\text{H}$  NMR spectra of 4-aminobenzylamine in the presence of AuMUS (4 equiv) at various  $\text{pH}_{\text{obs}}$  ( $\text{D}_2\text{O}$ , 298 K).

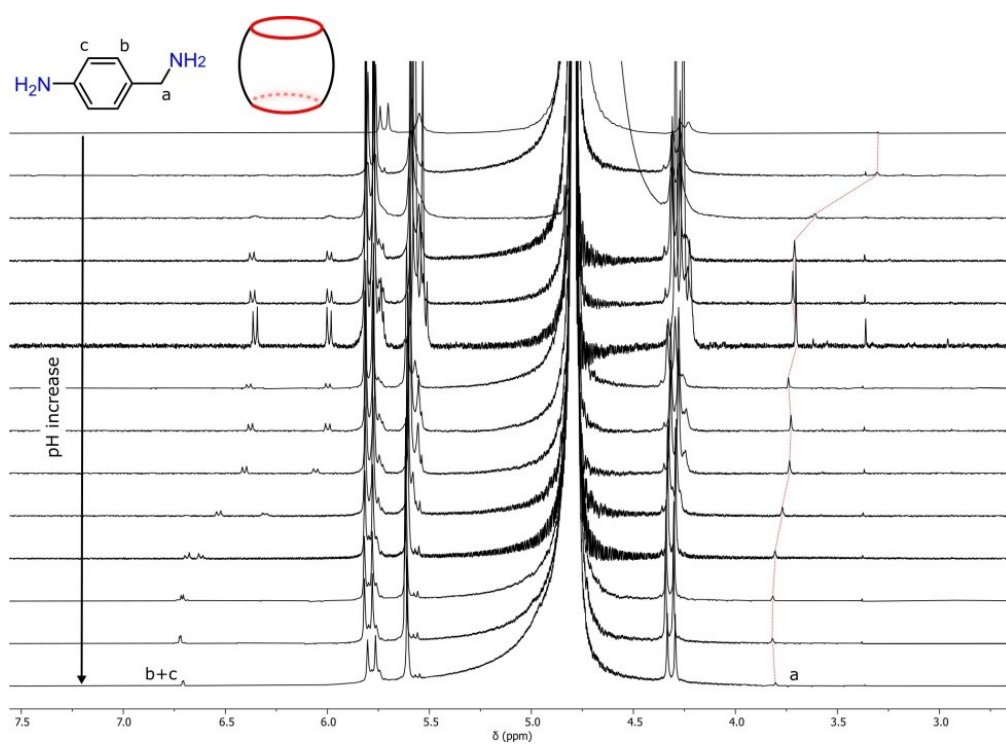

Fig. S11  $^1\text{H}$  NMR spectra of 4-aminobenzylamine in the presence of CB7 (4 equiv) at various  $\text{pH}_{\text{obs}}$  ( $\text{D}_2\text{O}$ , 298 K).

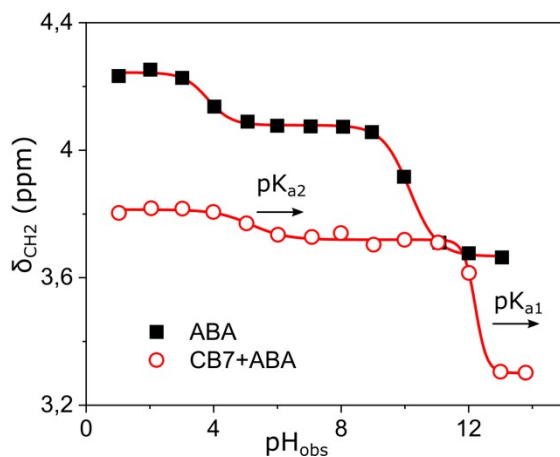

Fig. S12 Changes in chemical shifts of the methylene group in the presence and absence of CB7 depending on  $\text{pH}_{\text{obs}}$  ( $\text{D}_2\text{O}$ , 298 K).

## 6. Binding studies

Table S2. Binding thermodynamics of substrate with CB7.

| N,<br>(sites) | $\Delta H$ ,<br>kcal/mol | $-T\Delta S$ ,<br>kcal/mol | $\Delta G$ ,<br>kcal/mol |
|---------------|--------------------------|----------------------------|--------------------------|
| 0.95          | $-10.1 \pm 0.1$          | 1.7                        | -8.38                    |

Table S3. Binding thermodynamics of CB7 with AuMUS.

| binding event | N,<br>(sites) | $\Delta H$ ,<br>kcal/mol | $-T\Delta S$ ,<br>kcal/mol | $\Delta G$ ,<br>kcal/mol |
|---------------|---------------|--------------------------|----------------------------|--------------------------|
| 1             | 5.09          | $-11.6 \pm 0.2$          | 2.95                       | -8.65                    |
| 2             | 41.95         | $-3.07 \pm 0.04$         | -3.56                      | -6.63                    |

Table S4. Binding thermodynamics of substrate with AuMUS.

| N,<br>(sites) | $\Delta H$ ,<br>kcal/mol | $-T\Delta S$ ,<br>kcal/mol | $\Delta G$ ,<br>kcal/mol |
|---------------|--------------------------|----------------------------|--------------------------|
| 28.90         | $-3.77 \pm 0.09$         | -3.48                      | -7.25                    |



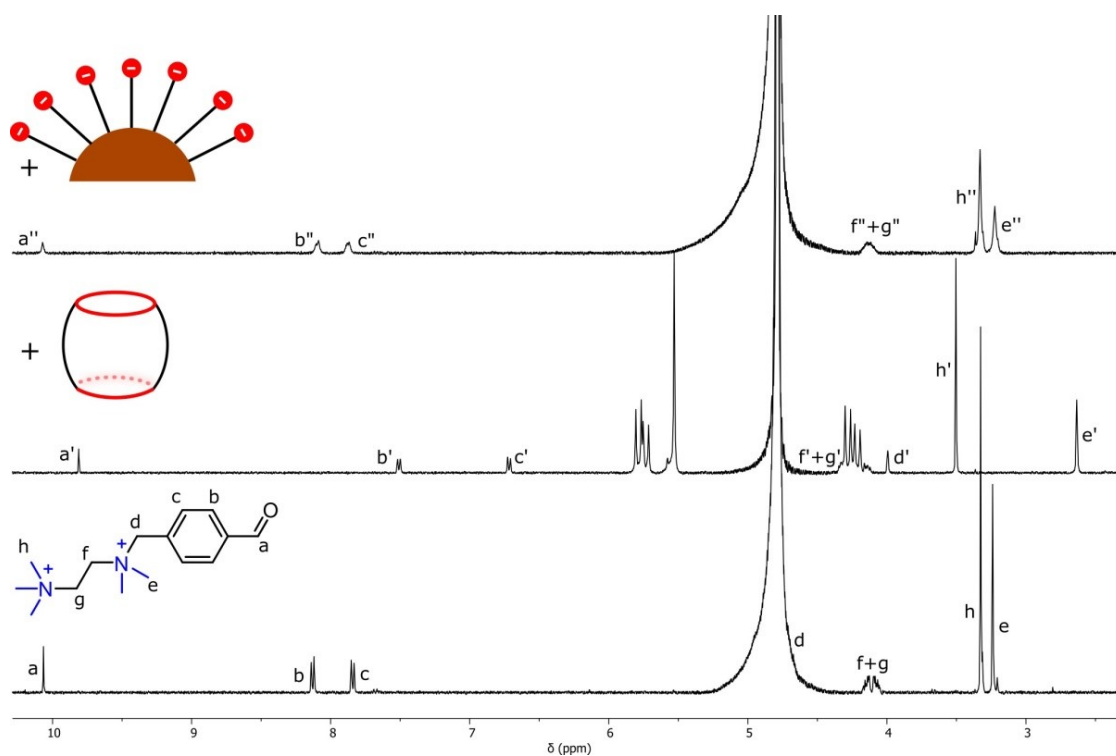

Fig. S13  $^1\text{H}$  NMR spectra obtained for the substrate alone and when combined with CB7 (1 equiv) and AuMUS (1 equiv) in  $\text{D}_2\text{O}$  at 298 K. The upfield shifts observed in the aromatic and aldehyde proton signals indicate the binding of the substrate within the CB7 cavity.

## 7. Kinetic studies

The advancement of the reaction was monitored by the emergence of a peak at a wavelength of 267 nm associated with the product. Measurements were conducted at 1 second intervals (or every 10 seconds for the uncatalyzed reaction).

The reaction rate was determined with respect to the product (oxime), on which the reaction shows a pseudo-first-order dependence due to a significant excess of hydroxylamine. The product yield, constrained to 40%, was calculated using the formula:

$$Y = \frac{A - A_0}{A_\infty - A_0}$$

where  $A$  is the absorbance at a time  $t$ ,  $A_0$  is the absorbance at the beginning of the reaction, and  $A_\infty$  is the absorbance at 100% conversion.

The rate constant ( $k$ ) was calculated as the slope of the function:

$$\ln \frac{1}{1 - Y} = kt$$

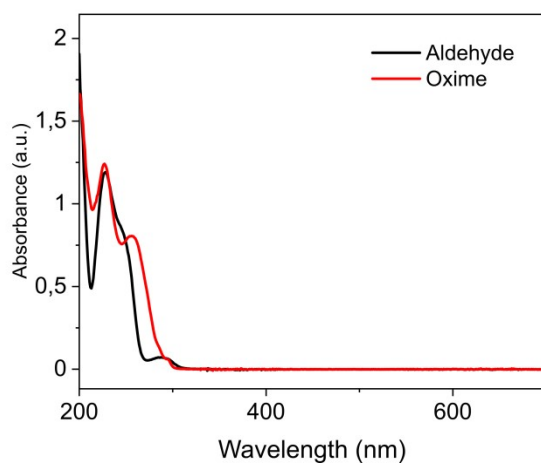

Fig. S14 Absorbance spectra for aldehyde (substrate) and oxime (product).

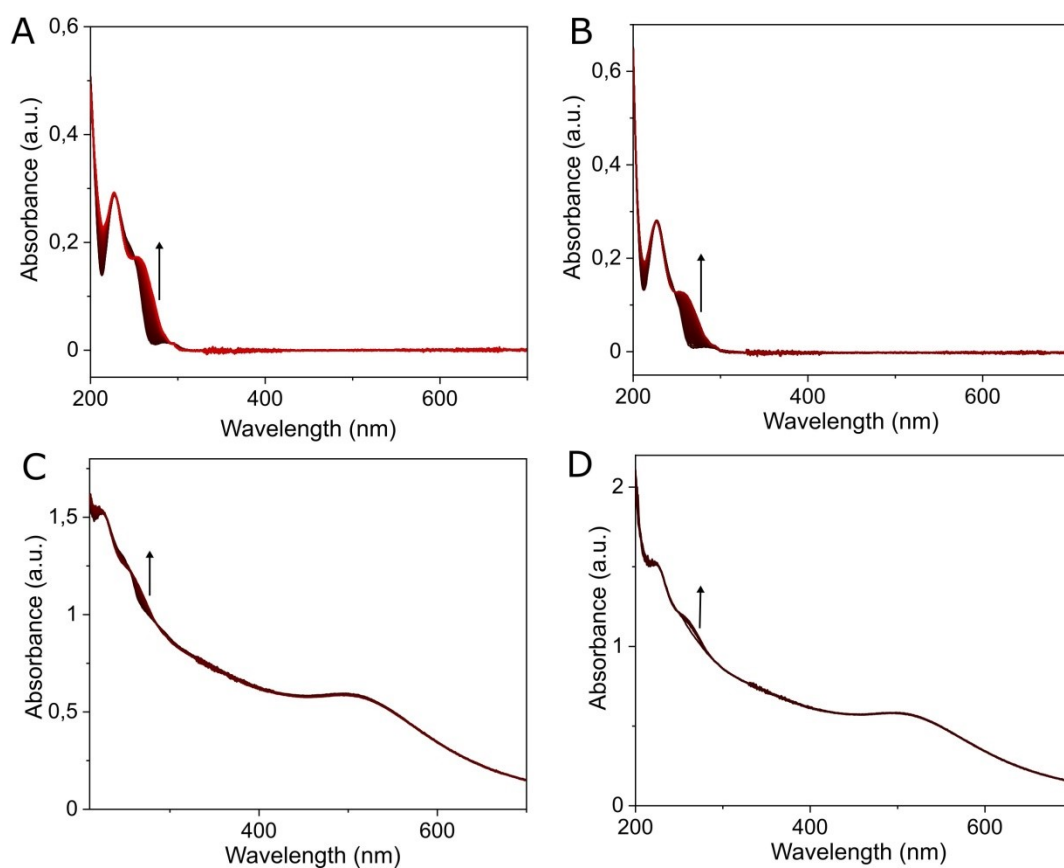

Fig. S15 Time-resolved absorbance spectra for the oxime formation reaction: (A) without catalyst; (B) CB7 (1 equiv); (C) AuMUS (4 equiv); (D) a mixture of CB7 (1 equiv) and AuMUS (4 equiv),  $D_2O$ , pH=6, 298 K.

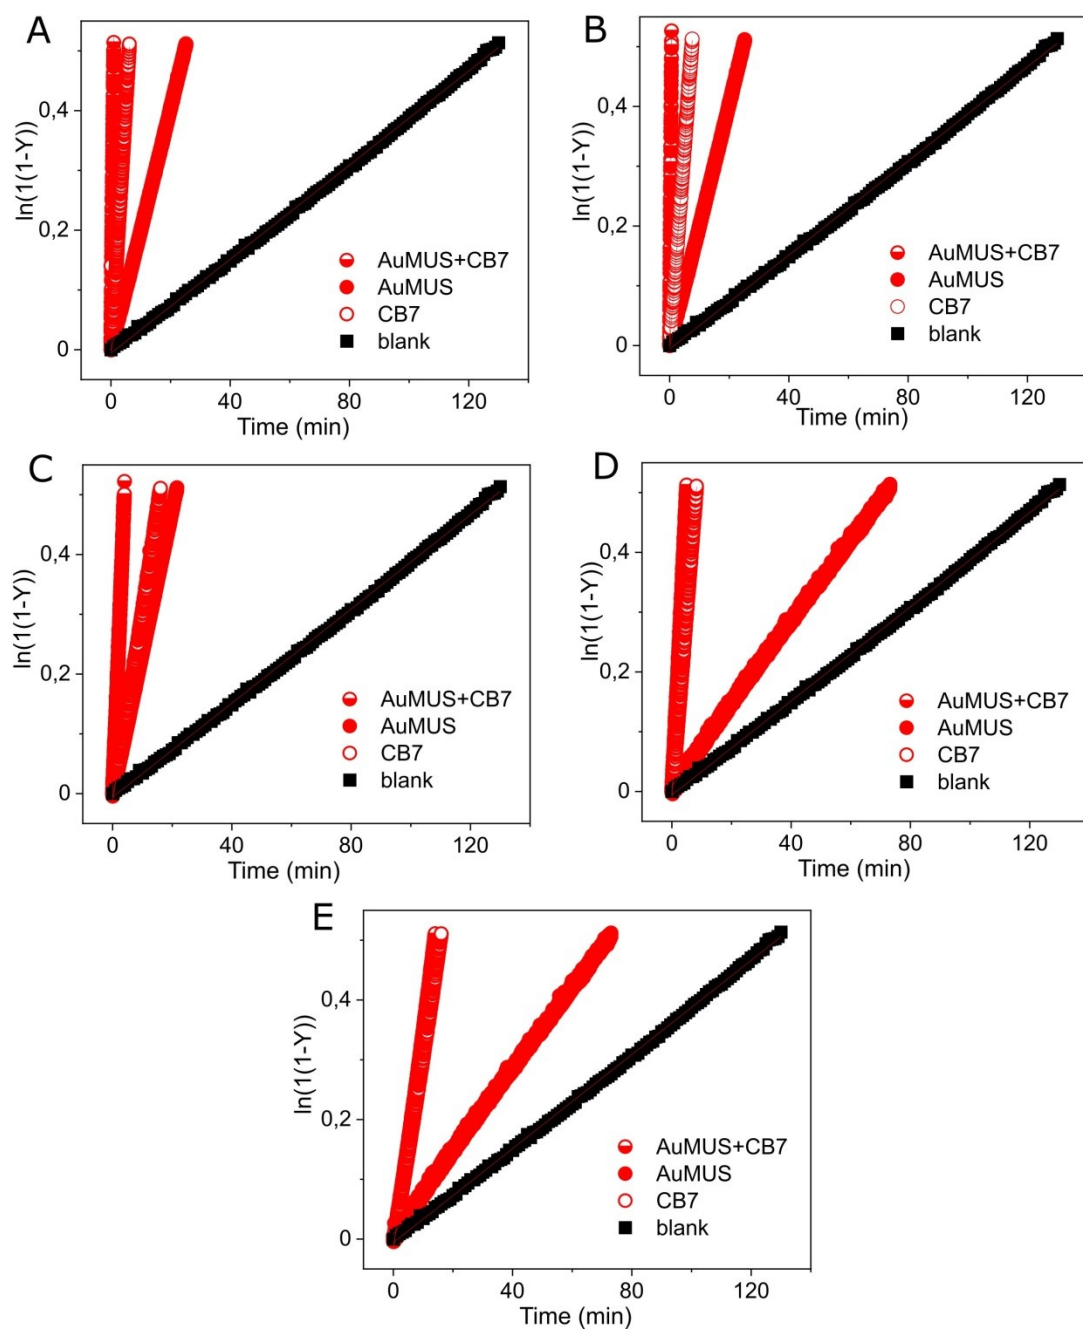

Fig. S16 Kinetic traces for the oxime formation reaction in the presence of catalysts used together and separately: (A) CB7 (4 equiv), AuMUS (1 equiv); (B) CB7 (1 equiv), AuMUS (1 equiv); (C) CB7 (0.25 equiv), AuMUS (1 equiv); (D) CB7 (1 equiv), AuMUS (0.25 equiv); (E) CB7 (0.25 equiv), AuMUS (0.25 equiv).

Table S5. Kinetic data for the oxime formation reaction in the presence of CB7 and AuMUS.

|                    | no catalyst | CB7        |         |         | AuMUS      |         |         |
|--------------------|-------------|------------|---------|---------|------------|---------|---------|
|                    |             | 0.25 equiv | 1 equiv | 4 equiv | 0.25 equiv | 1 equiv | 4 equiv |
| $k_{obs} (s^{-1})$ | 0.0039      | 0.0322     | 0.0672  | 0.0820  | 0.0069     | 0.0203  | 0.0738  |
| $\alpha$           | -           | 8.3        | 17.2    | 21.0    | 1.8        | 5.2     | 18.9    |

Table S6. Rate constants for the oxime formation reaction in the presence of the CB7-AuMUS mixture.

|                    | CB7:AuMUS ratio |        |        |        |        |           |
|--------------------|-----------------|--------|--------|--------|--------|-----------|
|                    | 1:4             | 4:1    | 1:1    | 0.25:1 | 1:0.25 | 0.25:0.25 |
| $k_{obs} (s^{-1})$ | 4.0701          | 0.5175 | 0.7842 | 0.1271 | 0.1027 | 0.0367    |

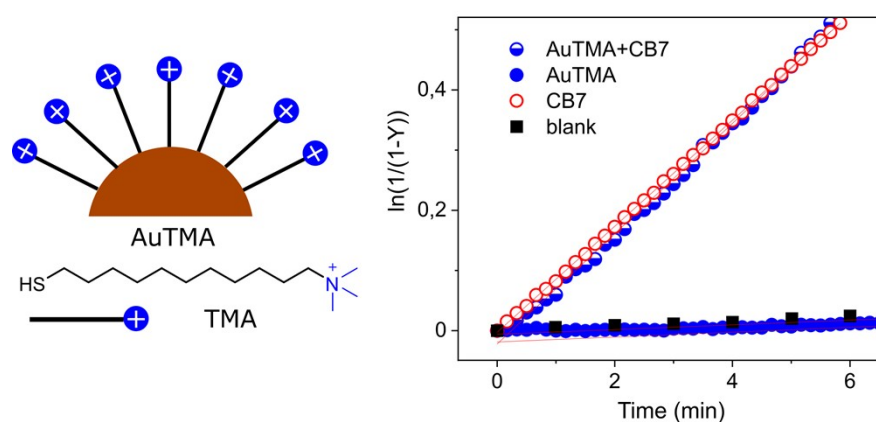

Fig. S17 Kinetic traces for the oxime formation reaction in the presence of CB7 (1 equiv) and AuTMA (1 equiv), used together and separately.

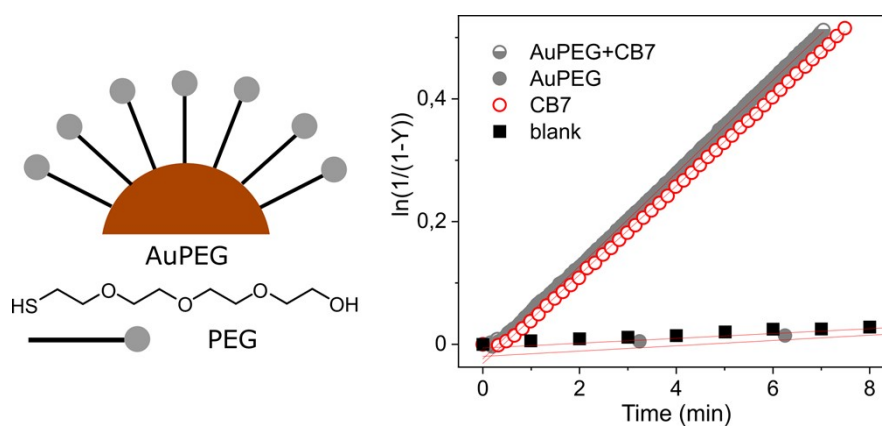

Fig. S18 Kinetic traces for the oxime formation reaction in the presence of CB7 (1 equiv) and AuPEG (1 equiv), used together and separately.

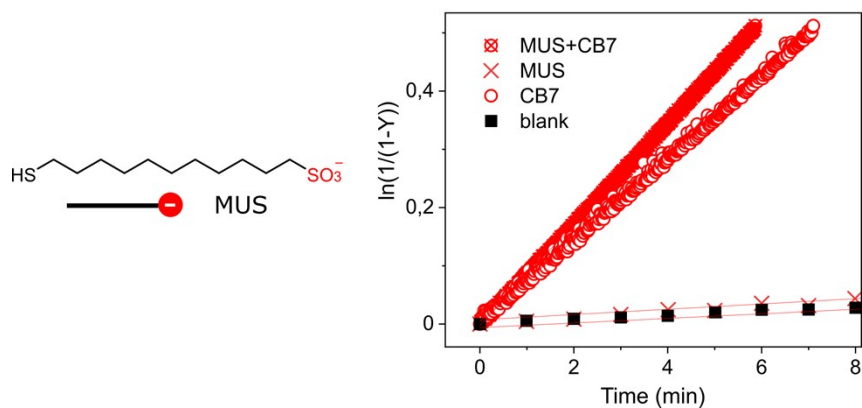

Fig. S19 Kinetic traces for the oxime formation reaction in the presence of CB7 (1 equiv) and MUS (1 equiv), used together and separately.

Table S7. Kinetic data for the oxime formation reaction in the presence of AuTMA, AuPEG and MUS.

|                              | AuTMA   | AuTMA+CB7 | AuPEG   | AuPEG+CB7 | MUS     | MUS+CB7 |
|------------------------------|---------|-----------|---------|-----------|---------|---------|
|                              | 1 equiv | 1 equiv   | 1 equiv | 1 equiv   | 1 equiv | 1 equiv |
| $k_{obs}$ (s <sup>-1</sup> ) | 0.0040  | 0.0917    | 0.0043  | 0.0757    | 0.0045  | 0.0869  |
| $\alpha$                     | 1.03    | 23.5      | 1.1     | 19.4      | 1.15    | 22.3    |

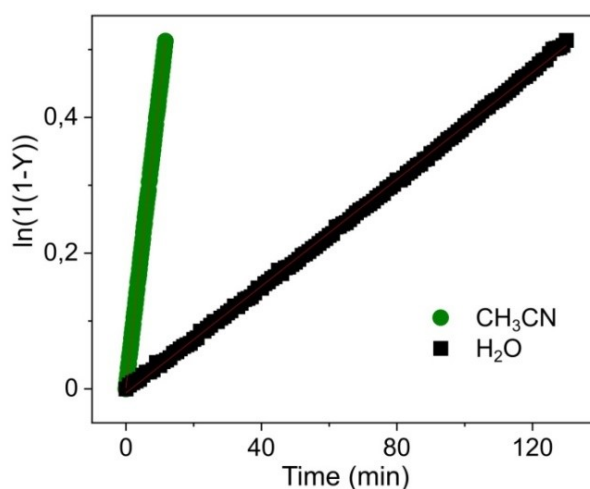

Fig. S20 Kinetic traces for the oxime formation reaction conducted separately in acetonitrile and water. The acetonitrile employed in the experiment contained 0.1% v/v hydroxylamine-containing water. The pH of the hydroxylamine-containing water was adjusted to 6 before its addition to the reaction system.

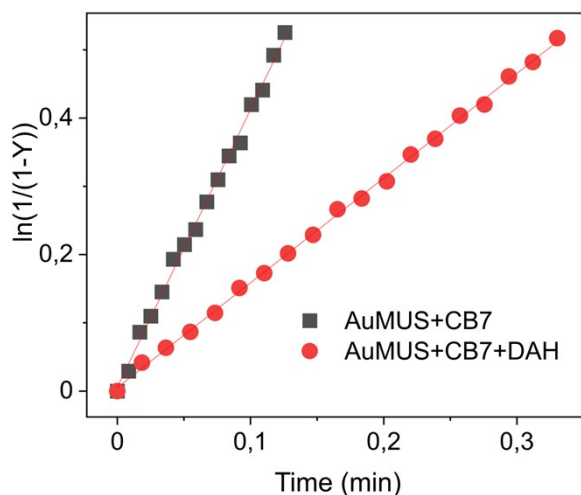

Fig. S21 Kinetic traces for the oxime formation reaction conducted in the absence and presence of 1 equivalent of 1,6-diaminohexane (DAH).

Table S8. Kinetic data for the oxime formation reaction conducted in acetonitrile.

|                              | CH <sub>3</sub> CN |
|------------------------------|--------------------|
| $k_{obs}$ (s <sup>-1</sup> ) | 0.0439             |
| $\alpha$                     | 11.3               |

## 8. Computational results

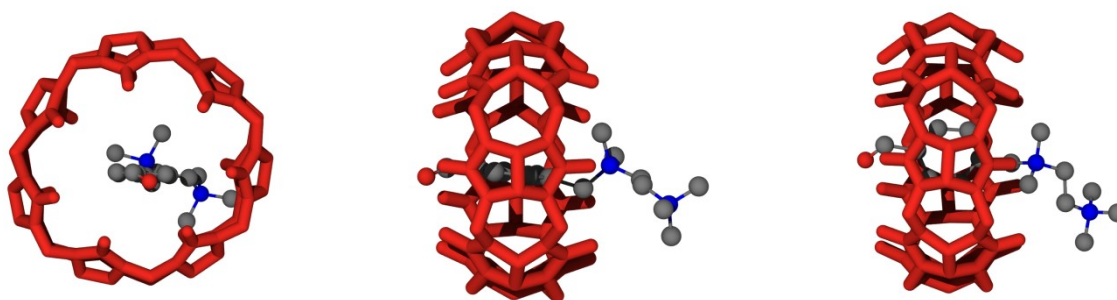

Fig. S22 Molecular structure (top and lateral views) of substrate  $\subset$  CB7 extracted from equilibrated atomistic simulations. CB7 molecule is colored in orange, while the atoms of the substrate are colored by element (C, grey; N, blue; O, red). Hydrogen atoms, water molecules, and counterions were removed for better clarity.

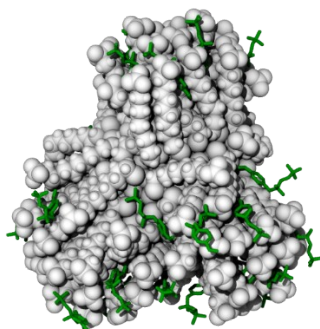

Fig. S23 Molecular structure of AuMUS nanoparticle with aldehydes interacting with the monolayer, extracted from equilibrated atomistic simulations. Atoms of ligands are colored in white, while aldehydes molecules are colored in green, with hydrogen atoms removed for better clarity. Water molecules and counterions are not shown.

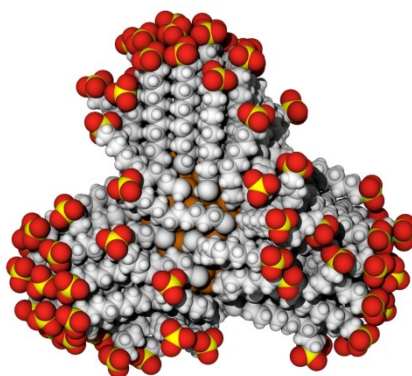

Fig. S24 Molecular structure of AuMUS nanoparticle extracted from equilibrated atomistic simulations, showing clustering of ligands on the gold surface. Water molecules and counterions were removed for better clarity. Atoms are colored by element (C, grey; O, red; S, yellow; H, white).

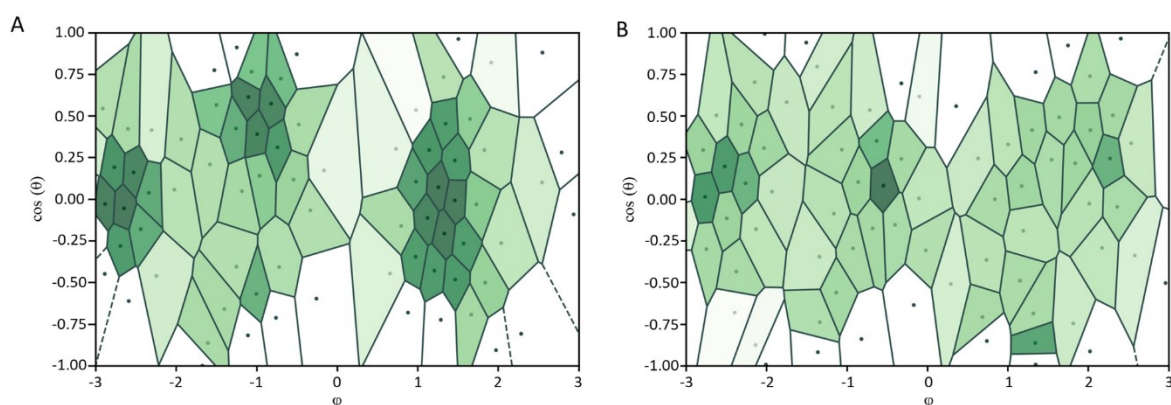

Fig. S25 Voronoi tessellation based on the center of mass (COM) of MUS ligands projected onto a bi-dimensional ( $\phi$ ,  $\cos(\theta)$ ) plane for (A) AuMUS nanoparticle and (B) AuMUS nanoparticle after CB7 binding (after the monolayer's structural reconfiguration). Each polygon is colored according to its value, where darker (lighter) regions represent smaller (larger) area with higher (lower) ligand density with respect to the average.

Table S9. Binding free energy of CB7/substrate and AuMUS/CB7 ( $\Delta G$ , kcal mol<sup>-1</sup>) from restrained umbrella sampling calculations.

|            | CB7/substrate  | AuMUS/CB7       |                |
|------------|----------------|-----------------|----------------|
|            |                | CB7@B1          | CB7@B2         |
| $\Delta G$ | -8.5 $\pm$ 0.1 | -10.6 $\pm$ 1.5 | -6.4 $\pm$ 1.3 |

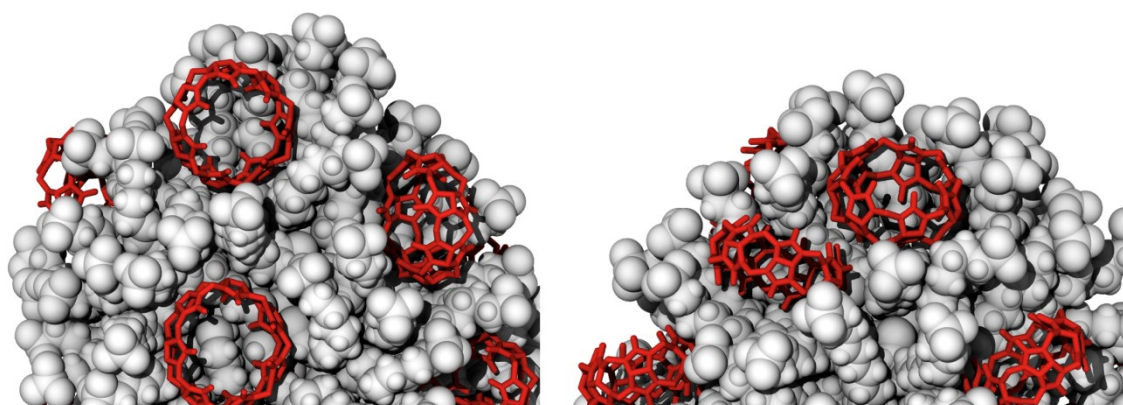

Fig. S26 Different zoom views of AuMUS (white)/CB7 (red) complex at high loading of CB7.

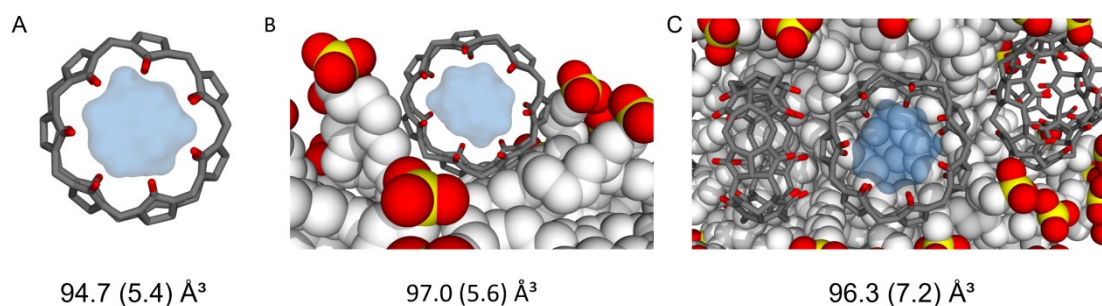

Fig. S27 Cavity volume of (A) CB7 in solution, (B) CB7@B1, and (C) CB7@B2. The cavity volume is shown as a light blue surface and the average value with standard deviation is reported. Calculation of the cavity volume was performed using CageCavityCalc (C3)<sup>27</sup> (probe radius 1Å).

## 9. Appendix

### 9.1 MD input files

*Example of AMBER 22 minimization input file:*



```

&cntrl
  ntp = 1000,
  ioutfm = 1,
  ntxo = 1,
  iwrap = 0,
  cut = 10.0,
  imin = 1,
  maxcyc = 100000,
  ncyc = 1500,
  ntmin = 1,
  ntr = 1,
  restraint_wt = 200,
  restraintmask = '@SH,AU',
/

```

*Example of AMBER 22 NVT simulation input file:*

```

&cntrl
  ioutfm = 1,
  ntxo = 2,
  iwrap = 0,
  cut = 10.0,
  ntc = 2,
  tol = 0.000001,
  ntf = 2,
  ntp = 500,
  ntwx = 1000,
  ntwr = 50000,
  nstlim = 100000,
  dt = 0.001,
  ig = -1,
  ntt = 3,
  gamma_ln = 1.0,
  temp0 = 300.0,
  ntr = 1,
  restraint_wt = 200,
  restraintmask = '@SH,AU',
/

&wt TYPE='TEMPO',
  value1=0.1, value2=300.0,
  istep1=0, istep2=100000,
/
&wt TYPE='END'
/

```

*Example of AMBER 22 NPT simulation input file:*

```

&cntrl
  ioutfm = 1,
  ntxo = 2,
  iwrap = 0,
  cut = 10.0,
  irest = 1,
  ntc = 2,
  tol = 0.000001,
  ntf = 2,
  ntx = 5,
  ntb = 2,
  ntp = 500000,
  ntwx = 50000,
  ntwr = 1000000,
  nstlim = 50000000,
  dt = 0.002,
  ig = -1,
  ntt = 3,
  gamma_ln = 2.0,
  temp0 = 300.0,

```

```

ntp = 1,
barostat = 2,
taup = 1.2,
ntr = 1,
restraint_wt = 200
restraintmask = '@SH,AU',
/

```

*Example of AMBER 22 NPT simulation input file with umbrella sampling restraint:*

```

&cntrl
  ioutfm = 1,
  ntxo = 2,
  iwrap = 0,
  cut = 10.0,
  irest = 1,
  ntc = 2,
  tol = 0.000001,
  ntf = 2,
  ntx = 5,
  ntb = 2,
  ntp = 10000,
  ntwx = 10000,
  ntwr = 50000,
  nstlim = 750000,
  dt = 0.002,
  ig = -1,
  ntt = 3,
  gamma_ln = 2.0,
  temp0 = 300.0,
  ntp = 1,
  barostat = 2,
  taup = 1.2,
  ntr = 1,
  nmropt = 0,
  infe=1,
/
&pmd
  output_file='collective_variable.dat'
  output_freq=1000
  cv_file='US_restraint.in'
/
&end
&wt
  type='END',
&end

```

*Example of AMBER 22 umbrella sampling restraint file*

```

&colvar
  cv_type='DISTANCE'
  cv_ni=2  cv_i=171,16
  anchor_position=0,2.85,2.85,102.85
  anchor_strength=10.0,10.0
/

```

## 9.2 MD molecular starting structures

*Starting structure of MUS ligand reported in mol2 format:*

```

@<TRIPOS>MOLECULE
MUS
  39    38    1    0    0
SMALL

```

USER\_CHARGES

@<TRIPOS>ATOM

|    |     |          |        |         |    |   |     |           |
|----|-----|----------|--------|---------|----|---|-----|-----------|
| 1  | SH  | -12.5490 | 6.7780 | 1.4960  | sh | 1 | MUS | -0.388900 |
| 2  | HS  | -13.4080 | 7.5610 | 0.8110  | hs | 1 | MUS | 0.209700  |
| 3  | C1  | -11.1460 | 6.8230 | 0.2890  | c3 | 1 | MUS | -0.159300 |
| 4  | H11 | -11.5190 | 6.4370 | -0.6680 | h1 | 1 | MUS | 0.096900  |
| 5  | H12 | -10.8640 | 7.8750 | 0.1490  | h1 | 1 | MUS | 0.096900  |
| 6  | C2  | -9.9180  | 5.9990 | 0.7560  | c3 | 1 | MUS | 0.016700  |
| 7  | H21 | -9.5890  | 6.3890 | 1.7280  | hc | 1 | MUS | 0.062000  |
| 8  | H22 | -10.2400 | 4.9630 | 0.9230  | hc | 1 | MUS | 0.062000  |
| 9  | C3  | -8.7210  | 6.0140 | -0.2390 | c3 | 1 | MUS | -0.035900 |
| 10 | H31 | -9.0550  | 5.6180 | -1.2070 | hc | 1 | MUS | 0.012800  |
| 11 | H32 | -8.4100  | 7.0530 | -0.4100 | hc | 1 | MUS | 0.012800  |
| 12 | C4  | -7.5010  | 5.1890 | 0.2620  | c3 | 1 | MUS | -0.001100 |
| 13 | H41 | -7.1620  | 5.5920 | 1.2240  | hc | 1 | MUS | -0.009900 |
| 14 | H42 | -7.8140  | 4.1540 | 0.4450  | hc | 1 | MUS | -0.009900 |
| 15 | C5  | -6.3030  | 5.1790 | -0.7250 | c3 | 1 | MUS | 0.034700  |
| 16 | H51 | -5.9720  | 6.2060 | -0.9200 | hc | 1 | MUS | -0.011200 |
| 17 | H52 | -6.6170  | 4.7560 | -1.6860 | hc | 1 | MUS | -0.011200 |
| 18 | C6  | -5.0980  | 4.3580 | -0.1840 | c3 | 1 | MUS | 0.023000  |
| 19 | H61 | -5.4110  | 3.3270 | 0.0190  | hc | 1 | MUS | -0.005600 |
| 20 | H62 | -4.7510  | 4.7870 | 0.7650  | hc | 1 | MUS | -0.005600 |
| 21 | C7  | -3.9150  | 4.3300 | -1.1810 | c3 | 1 | MUS | -0.001400 |
| 22 | H71 | -3.5960  | 5.3590 | -1.4000 | hc | 1 | MUS | -0.011600 |
| 23 | H72 | -4.2500  | 3.8880 | -2.1300 | hc | 1 | MUS | -0.011600 |
| 24 | C8  | -2.6930  | 3.5260 | -0.6590 | c3 | 1 | MUS | 0.011400  |
| 25 | H81 | -3.0080  | 2.5000 | -0.4210 | hc | 1 | MUS | -0.009200 |
| 26 | H82 | -2.3370  | 3.9760 | 0.2790  | hc | 1 | MUS | -0.009200 |
| 27 | C9  | -1.5670  | 3.5190 | -1.7240 | c3 | 1 | MUS | 0.034700  |
| 28 | H91 | -1.3140  | 4.5620 | -1.9460 | hc | 1 | MUS | -0.015800 |
| 29 | H92 | -1.9810  | 3.0860 | -2.6420 | hc | 1 | MUS | -0.015800 |
| 30 | C10 | -0.3010  | 2.7400 | -1.2790 | c3 | 1 | MUS | 0.043600  |
| 31 | H01 | 0.0780   | 3.1920 | -0.3610 | hc | 1 | MUS | 0.009500  |
| 32 | H02 | -0.5890  | 1.7140 | -1.0420 | hc | 1 | MUS | 0.009500  |
| 33 | C11 | 0.8160   | 2.7310 | -2.3530 | c3 | 1 | MUS | -0.190300 |
| 34 | H13 | 1.1720   | 3.7380 | -2.5790 | h1 | 1 | MUS | 0.051400  |
| 35 | H14 | 0.4900   | 2.2490 | -3.2750 | h1 | 1 | MUS | 0.051400  |
| 36 | S0  | 2.2920   | 1.8330 | -1.8820 | s6 | 1 | MUS | 1.163200  |
| 37 | O1  | 2.7210   | 2.5220 | -0.6800 | o  | 1 | MUS | -0.696200 |
| 38 | O2  | 1.7880   | 0.4910 | -1.6770 | o  | 1 | MUS | -0.696200 |
| 39 | O3  | 3.1470   | 2.0010 | -3.0400 | o  | 1 | MUS | -0.706300 |

@<TRIPOS>BOND

|    |    |    |   |
|----|----|----|---|
| 1  | 1  | 2  | 1 |
| 2  | 1  | 3  | 1 |
| 3  | 3  | 4  | 1 |
| 4  | 3  | 5  | 1 |
| 5  | 3  | 6  | 1 |
| 6  | 6  | 7  | 1 |
| 7  | 6  | 8  | 1 |
| 8  | 6  | 9  | 1 |
| 9  | 9  | 10 | 1 |
| 10 | 9  | 11 | 1 |
| 11 | 9  | 12 | 1 |
| 12 | 12 | 13 | 1 |
| 13 | 12 | 14 | 1 |
| 14 | 12 | 15 | 1 |
| 15 | 15 | 16 | 1 |
| 16 | 15 | 17 | 1 |
| 17 | 15 | 18 | 1 |
| 18 | 18 | 19 | 1 |
| 19 | 18 | 20 | 1 |
| 20 | 18 | 21 | 1 |
| 21 | 21 | 22 | 1 |
| 22 | 21 | 23 | 1 |
| 23 | 21 | 24 | 1 |
| 24 | 24 | 25 | 1 |
| 25 | 24 | 26 | 1 |
| 26 | 24 | 27 | 1 |
| 27 | 27 | 28 | 1 |
| 28 | 27 | 29 | 1 |

```

29 27 30 1
30 30 31 1
31 30 32 1
32 30 33 1
33 33 34 1
34 33 35 1
35 33 36 1
36 36 37 1
37 36 38 1
38 36 39 1
@<TRIPOS>SUBSTRUCTURE
1 MUS 1 TEMP 0 **** 0 ROOT

```

Starting structure of CB7 molecule reported in mol2 format:

```

@<TRIPOS>MOLECULE
CB7
126 147 1 0 0
SMALL
USER_CHARGES

```

```

@<TRIPOS>ATOM
1 N1 -23.7320 15.7530 6.8890 n 1 CB7 -0.0999
2 C1 -22.7640 16.4010 6.0600 c3 1 CB7 -0.0839
3 C2 -22.5200 15.4000 4.8950 c3 1 CB7 -0.0839
4 N2 -21.4630 16.6180 6.6160 n 1 CB7 -0.0999
5 N3 -23.3810 14.2980 5.1950 n 1 CB7 -0.0999
6 N4 -21.1140 15.1610 4.9240 n 1 CB7 -0.0999
7 C3 -23.6740 13.2290 4.2830 c3 1 CB7 0.0395
8 C4 -24.4360 16.3910 7.9620 c3 1 CB7 0.0395
9 C5 -24.1480 14.5500 6.3280 c 1 CB7 0.4174
10 C6 -20.3860 14.4770 3.8940 c3 1 CB7 0.0395
11 C7 -21.1520 17.6440 7.5690 c3 1 CB7 0.0395
12 C8 -20.4880 15.9420 5.8920 c 1 CB7 0.4174
13 O1 -25.1000 13.8880 6.6970 o 1 CB7 -0.4185
14 O2 -19.2860 16.1020 6.0050 o 1 CB7 -0.4185
15 N5 -22.6920 12.1840 4.2500 n 1 CB7 -0.0999
16 N6 -20.4220 13.0460 3.9800 n 1 CB7 -0.0999
17 C9 -21.4860 12.2330 3.4810 c3 1 CB7 -0.0839
18 C10 -22.9540 10.8920 4.6920 c 1 CB7 0.4174
19 C11 -19.2940 12.2790 4.2590 c 1 CB7 0.4174
20 O3 -18.1820 12.7200 4.4980 o 1 CB7 -0.4185
21 N7 -19.6100 10.9370 4.0810 n 1 CB7 -0.0999
22 O4 -24.0010 10.5120 5.1880 o 1 CB7 -0.4185
23 N8 -21.8810 10.0770 4.3500 n 1 CB7 -0.0999
24 C12 -20.9280 10.7830 3.5490 c3 1 CB7 -0.0839
25 C13 -18.6220 9.8990 4.1100 c3 1 CB7 0.0395
26 C14 -21.9080 8.6520 4.5010 c3 1 CB7 0.0395
27 N9 -21.0070 8.1340 5.4880 n 1 CB7 -0.0999
28 N10 -18.7370 8.9930 5.2170 n 1 CB7 -0.0999
29 N11 -23.7180 16.4460 9.2040 n 1 CB7 -0.0999
30 N12 -21.4490 17.3100 8.9300 n 1 CB7 -0.0999
31 C15 -19.6200 7.8710 5.2540 c3 1 CB7 -0.0839
32 C16 -17.7810 8.9140 6.2230 c 1 CB7 0.4174
33 C17 -21.4420 7.5290 6.6610 c 1 CB7 0.4174
34 O5 -16.7850 9.6120 6.3120 o 1 CB7 -0.4185
35 N13 -18.0740 7.8230 7.0340 n 1 CB7 -0.0999
36 O6 -22.6040 7.4080 7.0060 o 1 CB7 -0.4185
37 N14 -20.3440 6.9630 7.3040 n 1 CB7 -0.0999
38 C18 -19.1670 7.0650 6.5030 c3 1 CB7 -0.0839
39 C19 -22.7430 17.4380 9.5280 c3 1 CB7 -0.0839
40 C20 -24.1210 15.7470 10.3370 c 1 CB7 0.4174
41 C21 -20.4650 17.1410 9.8960 c 1 CB7 0.4174
42 O7 -19.2630 17.2100 9.7030 o 1 CB7 -0.4185
43 N15 -21.0740 17.0190 11.1400 n 1 CB7 -0.0999
44 O8 -25.0770 14.9910 10.4000 o 1 CB7 -0.4185
45 N16 -23.3420 16.1540 11.4120 n 1 CB7 -0.0999

```

|     |     |          |         |         |    |   |     |         |
|-----|-----|----------|---------|---------|----|---|-----|---------|
| 46  | C22 | -22.4840 | 17.2400 | 11.0480 | c3 | 1 | CB7 | -0.0839 |
| 47  | N17 | -20.3640 | 15.7690 | 13.0830 | n  | 1 | CB7 | -0.0999 |
| 48  | N18 | -22.6330 | 14.9040 | 13.3560 | n  | 1 | CB7 | -0.0999 |
| 49  | C23 | -19.2370 | 14.9740 | 13.2570 | c  | 1 | CB7 | 0.4174  |
| 50  | C24 | -21.4210 | 15.3650 | 13.9580 | c3 | 1 | CB7 | -0.0839 |
| 51  | C25 | -22.8950 | 13.5850 | 13.6990 | c  | 1 | CB7 | 0.4174  |
| 52  | O9  | -23.9460 | 12.9960 | 13.5070 | o  | 1 | CB7 | -0.4185 |
| 53  | N19 | -21.8150 | 13.0890 | 14.4190 | n  | 1 | CB7 | -0.0999 |
| 54  | O10 | -18.1300 | 15.2070 | 12.8000 | o  | 1 | CB7 | -0.4185 |
| 55  | N20 | -19.5450 | 13.9490 | 14.1440 | n  | 1 | CB7 | -0.0999 |
| 56  | C26 | -21.8400 | 11.8120 | 15.0770 | c3 | 1 | CB7 | 0.0395  |
| 57  | C27 | -20.8560 | 14.1160 | 14.6900 | c3 | 1 | CB7 | -0.0839 |
| 58  | C28 | -18.5530 | 13.0610 | 14.6780 | c3 | 1 | CB7 | 0.0395  |
| 59  | N21 | -20.9480 | 10.8360 | 14.5260 | n  | 1 | CB7 | -0.0999 |
| 60  | N22 | -18.6770 | 11.6970 | 14.2520 | n  | 1 | CB7 | -0.0999 |
| 61  | C29 | -21.3940 | 9.6870  | 13.8830 | c  | 1 | CB7 | 0.4174  |
| 62  | C30 | -19.6080 | 10.7910 | 14.8120 | c3 | 1 | CB7 | -0.0839 |
| 63  | C31 | -17.7340 | 11.0750 | 13.4390 | c  | 1 | CB7 | 0.4174  |
| 64  | O11 | -16.7430 | 11.6070 | 12.9710 | o  | 1 | CB7 | -0.4185 |
| 65  | N23 | -18.0330 | 9.7180  | 13.3680 | n  | 1 | CB7 | -0.0999 |
| 66  | O12 | -22.5590 | 9.3990  | 13.6780 | o  | 1 | CB7 | -0.4185 |
| 67  | N24 | -20.3020 | 8.8570  | 13.6440 | n  | 1 | CB7 | -0.0999 |
| 68  | C32 | -17.1540 | 8.7630  | 12.7610 | c3 | 1 | CB7 | 0.0395  |
| 69  | C33 | -20.4400 | 7.5160  | 13.1570 | c3 | 1 | CB7 | 0.0395  |
| 70  | C34 | -19.1140 | 9.3820  | 14.2410 | c3 | 1 | CB7 | -0.0839 |
| 71  | N25 | -19.9300 | 7.3000  | 11.8340 | n  | 1 | CB7 | -0.0999 |
| 72  | N26 | -17.6570 | 8.1600  | 11.5600 | n  | 1 | CB7 | -0.0999 |
| 73  | C35 | -20.7470 | 6.9930  | 10.7520 | c  | 1 | CB7 | 0.4174  |
| 74  | C36 | -18.5560 | 7.0470  | 11.5320 | c3 | 1 | CB7 | -0.0839 |
| 75  | C37 | -17.0880 | 8.3770  | 10.3120 | c  | 1 | CB7 | 0.4174  |
| 76  | O13 | -16.1450 | 9.1150  | 10.0840 | o  | 1 | CB7 | -0.4185 |
| 77  | N27 | -17.6730 | 7.5130  | 9.3940  | n  | 1 | CB7 | -0.0999 |
| 78  | O14 | -21.9630 | 6.9140  | 10.7840 | o  | 1 | CB7 | -0.4185 |
| 79  | N28 | -19.9440 | 6.6550  | 9.6680  | n  | 1 | CB7 | -0.0999 |
| 80  | C38 | -18.5640 | 6.5990  | 10.0420 | c3 | 1 | CB7 | -0.0839 |
| 81  | C39 | -20.3340 | 17.0140 | 12.3690 | c3 | 1 | CB7 | 0.0395  |
| 82  | C40 | -23.6200 | 15.7630 | 12.7640 | c3 | 1 | CB7 | 0.0395  |
| 83  | C41 | -20.4740 | 6.1100  | 8.4500  | c3 | 1 | CB7 | 0.0395  |
| 84  | C42 | -17.1870 | 7.3530  | 8.0560  | c3 | 1 | CB7 | 0.0395  |
| 85  | H1  | -23.1730 | 17.3960 | 5.8290  | h2 | 1 | CB7 | 0.1165  |
| 86  | H2  | -22.7580 | 15.7090 | 3.8670  | h2 | 1 | CB7 | 0.1165  |
| 87  | H3  | -23.7410 | 13.6590 | 3.2730  | h2 | 1 | CB7 | 0.0644  |
| 88  | H4  | -24.6310 | 12.7810 | 4.5880  | h2 | 1 | CB7 | 0.0644  |
| 89  | H5  | -24.6520 | 17.4250 | 7.6540  | h2 | 1 | CB7 | 0.0644  |
| 90  | H6  | -25.3640 | 15.8270 | 8.1360  | h2 | 1 | CB7 | 0.0644  |
| 91  | H7  | -19.3340 | 14.7900 | 3.9630  | h2 | 1 | CB7 | 0.0644  |
| 92  | H8  | -20.8230 | 14.7650 | 2.9270  | h2 | 1 | CB7 | 0.0644  |
| 93  | H9  | -20.0730 | 17.8480 | 7.5020  | h2 | 1 | CB7 | 0.0644  |
| 94  | H10 | -21.7410 | 18.5350 | 7.3060  | h2 | 1 | CB7 | 0.0644  |
| 95  | H11 | -21.7600 | 12.6520 | 2.5020  | h2 | 1 | CB7 | 0.1165  |
| 96  | H12 | -20.8200 | 10.2090 | 2.6170  | h2 | 1 | CB7 | 0.1165  |
| 97  | H13 | -18.7230 | 9.3130  | 3.1850  | h2 | 1 | CB7 | 0.0644  |
| 98  | H14 | -17.6330 | 10.3780 | 4.1690  | h2 | 1 | CB7 | 0.0644  |
| 99  | H15 | -22.9280 | 8.3660  | 4.7960  | h2 | 1 | CB7 | 0.0644  |
| 100 | H16 | -21.6350 | 8.2080  | 3.5330  | h2 | 1 | CB7 | 0.0644  |
| 101 | H17 | -19.5570 | 7.3970  | 4.2640  | h2 | 1 | CB7 | 0.1165  |
| 102 | H18 | -18.7960 | 6.0380  | 6.3680  | h2 | 1 | CB7 | 0.1165  |
| 103 | H19 | -23.1510 | 18.3970 | 9.1770  | h2 | 1 | CB7 | 0.1165  |
| 104 | H20 | -22.7140 | 18.0640 | 11.7390 | h2 | 1 | CB7 | 0.1165  |
| 105 | H21 | -21.6890 | 16.2530 | 14.5490 | h2 | 1 | CB7 | 0.1165  |
| 106 | H22 | -21.5560 | 11.9710 | 16.1280 | h2 | 1 | CB7 | 0.0644  |
| 107 | H23 | -22.8620 | 11.4140 | 14.9980 | h2 | 1 | CB7 | 0.0644  |
| 108 | H24 | -20.7330 | 14.1480 | 15.7830 | h2 | 1 | CB7 | 0.1165  |
| 109 | H25 | -17.5670 | 13.4250 | 14.3540 | h2 | 1 | CB7 | 0.0644  |
| 110 | H26 | -18.6420 | 13.0790 | 15.7740 | h2 | 1 | CB7 | 0.0644  |
| 111 | H27 | -19.5970 | 11.0240 | 15.8870 | h2 | 1 | CB7 | 0.1165  |
| 112 | H28 | -16.9770 | 7.9590  | 13.4910 | h2 | 1 | CB7 | 0.0644  |
| 113 | H29 | -16.2180 | 9.2830  | 12.5080 | h2 | 1 | CB7 | 0.0644  |
| 114 | H30 | -21.5130 | 7.2720  | 13.1460 | h2 | 1 | CB7 | 0.0644  |
| 115 | H31 | -19.8890 | 6.8530  | 13.8400 | h2 | 1 | CB7 | 0.0644  |
| 116 | H32 | -18.7220 | 8.6160  | 14.9270 | h2 | 1 | CB7 | 0.1165  |
| 117 | H33 | -18.1990 | 6.3440  | 12.2990 | h2 | 1 | CB7 | 0.1165  |

|     |     |          |         |         |    |   |     |        |
|-----|-----|----------|---------|---------|----|---|-----|--------|
| 118 | H34 | -18.2120 | 5.5890  | 9.7870  | h2 | 1 | CB7 | 0.1165 |
| 119 | H35 | -19.2840 | 17.2380 | 12.1290 | h2 | 1 | CB7 | 0.0644 |
| 120 | H36 | -20.7650 | 17.7860 | 13.0230 | h2 | 1 | CB7 | 0.0644 |
| 121 | H37 | -23.6770 | 16.6770 | 13.3730 | h2 | 1 | CB7 | 0.0644 |
| 122 | H38 | -24.5790 | 15.2240 | 12.7670 | h2 | 1 | CB7 | 0.0644 |
| 123 | H39 | -21.5460 | 5.9190  | 8.6060  | h2 | 1 | CB7 | 0.0644 |
| 124 | H40 | -19.9320 | 5.1770  | 8.2370  | h2 | 1 | CB7 | 0.0644 |
| 125 | H41 | -17.0200 | 6.2790  | 7.8860  | h2 | 1 | CB7 | 0.0644 |
| 126 | H42 | -16.2480 | 7.9190  | 7.9710  | h2 | 1 | CB7 | 0.0644 |

@<TRIPOS>BOND

|    |    |     |   |
|----|----|-----|---|
| 1  | 1  | 2   | 1 |
| 2  | 1  | 8   | 1 |
| 3  | 1  | 9   | 1 |
| 4  | 2  | 3   | 1 |
| 5  | 2  | 4   | 1 |
| 6  | 2  | 85  | 1 |
| 7  | 3  | 5   | 1 |
| 8  | 3  | 6   | 1 |
| 9  | 3  | 86  | 1 |
| 10 | 4  | 11  | 1 |
| 11 | 4  | 12  | 1 |
| 12 | 5  | 7   | 1 |
| 13 | 5  | 9   | 1 |
| 14 | 6  | 10  | 1 |
| 15 | 6  | 12  | 1 |
| 16 | 7  | 15  | 1 |
| 17 | 7  | 87  | 1 |
| 18 | 7  | 88  | 1 |
| 19 | 8  | 29  | 1 |
| 20 | 8  | 89  | 1 |
| 21 | 8  | 90  | 1 |
| 22 | 9  | 13  | 2 |
| 23 | 10 | 16  | 1 |
| 24 | 10 | 91  | 1 |
| 25 | 10 | 92  | 1 |
| 26 | 11 | 30  | 1 |
| 27 | 11 | 93  | 1 |
| 28 | 11 | 94  | 1 |
| 29 | 12 | 14  | 2 |
| 30 | 15 | 17  | 1 |
| 31 | 15 | 18  | 1 |
| 32 | 16 | 17  | 1 |
| 33 | 16 | 19  | 1 |
| 34 | 17 | 24  | 1 |
| 35 | 17 | 95  | 1 |
| 36 | 18 | 22  | 2 |
| 37 | 18 | 23  | 1 |
| 38 | 19 | 20  | 2 |
| 39 | 19 | 21  | 1 |
| 40 | 21 | 24  | 1 |
| 41 | 21 | 25  | 1 |
| 42 | 23 | 24  | 1 |
| 43 | 23 | 26  | 1 |
| 44 | 24 | 96  | 1 |
| 45 | 25 | 28  | 1 |
| 46 | 25 | 97  | 1 |
| 47 | 25 | 98  | 1 |
| 48 | 26 | 27  | 1 |
| 49 | 26 | 99  | 1 |
| 50 | 26 | 100 | 1 |
| 51 | 27 | 31  | 1 |
| 52 | 27 | 33  | 1 |
| 53 | 28 | 31  | 1 |
| 54 | 28 | 32  | 1 |
| 55 | 29 | 39  | 1 |
| 56 | 29 | 40  | 1 |
| 57 | 30 | 39  | 1 |
| 58 | 30 | 41  | 1 |
| 59 | 31 | 38  | 1 |
| 60 | 31 | 101 | 1 |
| 61 | 32 | 34  | 2 |
| 62 | 32 | 35  | 1 |

|     |    |     |   |
|-----|----|-----|---|
| 63  | 33 | 36  | 2 |
| 64  | 33 | 37  | 1 |
| 65  | 35 | 38  | 1 |
| 66  | 35 | 84  | 1 |
| 67  | 37 | 38  | 1 |
| 68  | 37 | 83  | 1 |
| 69  | 38 | 102 | 1 |
| 70  | 39 | 46  | 1 |
| 71  | 39 | 103 | 1 |
| 72  | 40 | 44  | 2 |
| 73  | 40 | 45  | 1 |
| 74  | 41 | 42  | 2 |
| 75  | 41 | 43  | 1 |
| 76  | 43 | 46  | 1 |
| 77  | 43 | 81  | 1 |
| 78  | 45 | 46  | 1 |
| 79  | 45 | 82  | 1 |
| 80  | 46 | 104 | 1 |
| 81  | 47 | 49  | 1 |
| 82  | 47 | 50  | 1 |
| 83  | 47 | 81  | 1 |
| 84  | 48 | 50  | 1 |
| 85  | 48 | 51  | 1 |
| 86  | 48 | 82  | 1 |
| 87  | 49 | 54  | 2 |
| 88  | 49 | 55  | 1 |
| 89  | 50 | 57  | 1 |
| 90  | 50 | 105 | 1 |
| 91  | 51 | 52  | 2 |
| 92  | 51 | 53  | 1 |
| 93  | 53 | 56  | 1 |
| 94  | 53 | 57  | 1 |
| 95  | 55 | 57  | 1 |
| 96  | 55 | 58  | 1 |
| 97  | 56 | 59  | 1 |
| 98  | 56 | 106 | 1 |
| 99  | 56 | 107 | 1 |
| 100 | 57 | 108 | 1 |
| 101 | 58 | 60  | 1 |
| 102 | 58 | 109 | 1 |
| 103 | 58 | 110 | 1 |
| 104 | 59 | 61  | 1 |
| 105 | 59 | 62  | 1 |
| 106 | 60 | 62  | 1 |
| 107 | 60 | 63  | 1 |
| 108 | 61 | 66  | 2 |
| 109 | 61 | 67  | 1 |
| 110 | 62 | 70  | 1 |
| 111 | 62 | 111 | 1 |
| 112 | 63 | 64  | 2 |
| 113 | 63 | 65  | 1 |
| 114 | 65 | 68  | 1 |
| 115 | 65 | 70  | 1 |
| 116 | 67 | 69  | 1 |
| 117 | 67 | 70  | 1 |
| 118 | 68 | 72  | 1 |
| 119 | 68 | 112 | 1 |
| 120 | 68 | 113 | 1 |
| 121 | 69 | 71  | 1 |
| 122 | 69 | 114 | 1 |
| 123 | 69 | 115 | 1 |
| 124 | 70 | 116 | 1 |
| 125 | 71 | 73  | 1 |
| 126 | 71 | 74  | 1 |
| 127 | 72 | 74  | 1 |
| 128 | 72 | 75  | 1 |
| 129 | 73 | 78  | 2 |
| 130 | 73 | 79  | 1 |
| 131 | 74 | 80  | 1 |
| 132 | 74 | 117 | 1 |
| 133 | 75 | 76  | 2 |
| 134 | 75 | 77  | 1 |

```

135 77 80 1
136 77 84 1
137 79 80 1
138 79 83 1
139 80 118 1
140 81 119 1
141 81 120 1
142 82 121 1
143 82 122 1
144 83 123 1
145 83 124 1
146 84 125 1
147 84 126 1
@<TRIPOS>SUBSTRUCTURE
1 CB7 1 TEMP 0 **** 0 ROOT

```

Starting structure of aldehyde molecule reported in mol2 format:

```

@<TRIPOS>MOLECULE
ALD
44 44 1 0 0
SMALL
USER_CHARGES

```

```

@<TRIPOS>ATOM
1 C4 -1.4980 -0.1510 0.0360 ca 1 ALD -0.0956
2 H3 -2.5320 -0.0580 -0.1640 ha 1 ALD 0.1184
3 C5 -0.9300 -1.4200 0.1530 ca 1 ALD 0.0254
4 C6 0.4440 -1.5050 0.4190 ca 1 ALD -0.0956
5 H4 0.9130 -2.4490 0.5150 ha 1 ALD 0.1184
6 C7 1.2130 -0.3470 0.5600 ca 1 ALD -0.1130
7 H5 2.2690 -0.4080 0.7630 ha 1 ALD 0.1493
8 C2 0.6240 0.9050 0.4380 ca 1 ALD 0.0412
9 C3 -0.7340 1.0010 0.1770 ca 1 ALD -0.1130
10 H2 -1.1890 1.9560 0.0830 ha 1 ALD 0.1493
11 C1 1.4370 2.1120 0.5860 c 1 ALD 0.3520
12 H1 0.9940 3.0770 0.4940 h4 1 ALD 0.0276
13 O1 2.6430 2.0020 0.8160 o 1 ALD -0.3282
14 C8 -1.9390 -2.6450 -0.0380 c3 1 ALD -0.1270
15 H7 -2.3470 -2.5390 -1.0580 hx 1 ALD 0.1294
16 H6 -2.7890 -2.4380 0.6340 hx 1 ALD 0.1294
17 N1 -1.5220 -4.1110 0.1530 n4 1 ALD 0.0442
18 C11 -1.0720 -4.3730 1.5440 c3 1 ALD -0.0543
19 H11 -0.8280 -5.4420 1.6570 hx 1 ALD 0.0964
20 H12 -0.1800 -3.7720 1.7680 hx 1 ALD 0.0964
21 H10 -1.8770 -4.1080 2.2480 hx 1 ALD 0.0964
22 C10 -2.7160 -4.9400 -0.1040 c3 1 ALD -0.0450
23 H9 -3.5150 -4.6660 0.6040 hx 1 ALD 0.0917
24 H8 -3.0680 -4.7700 -1.1340 hx 1 ALD 0.0917
25 C9 -0.4710 -4.5240 -0.8150 c3 1 ALD -0.0543
26 H15 0.4400 -3.9330 -0.6550 hx 1 ALD 0.0964
27 H14 -0.2400 -5.5920 -0.6710 hx 1 ALD 0.0964
28 H13 -0.8340 -4.3660 -1.8430 hx 1 ALD 0.0964
29 C12 -2.3640 -6.4280 0.0760 c3 1 ALD -0.1119
30 H16 -1.8970 -6.7950 -0.8140 hx 1 ALD 0.1262
31 H17 -1.6920 -6.5380 0.9020 hx 1 ALD 0.1262
32 N2 -3.6490 -7.2310 0.3500 n4 1 ALD 0.0186
33 C13 -4.8190 -6.2740 0.5120 c3 1 ALD -0.1594
34 H18 -5.5040 -6.4080 -0.2990 hx 1 ALD 0.1443
35 H19 -5.3180 -6.4740 1.4370 hx 1 ALD 0.1443
36 H20 -4.4580 -5.2670 0.5120 hx 1 ALD 0.1443
37 C14 -3.9190 -8.1680 -0.8160 c3 1 ALD -0.1594
38 H21 -3.0010 -8.3780 -1.3240 hx 1 ALD 0.1443
39 H22 -4.3420 -9.0800 -0.4500 hx 1 ALD 0.1443
40 H23 -4.6040 -7.7050 -1.4950 hx 1 ALD 0.1443
41 C15 -3.4780 -8.0430 1.6230 c3 1 ALD -0.1594
42 H24 -3.9010 -9.0160 1.4850 hx 1 ALD 0.1443
43 H25 -2.4370 -8.1350 1.8510 hx 1 ALD 0.1443
44 H26 -3.9770 -7.5490 2.4310 hx 1 ALD 0.1443

```



```

@<TRIPOS>BOND
  1  1  2  1
  2  1  3  ar
  3  1  9  ar
  4  3  4  ar
  5  3 14  1
  6  4  5  1
  7  4  6  ar
  8  6  7  1
  9  6  8  ar
 10  8  9  ar
 11  8 11  1
 12  9 10  1
 13 11 12  1
 14 11 13  2
 15 14 15  1
 16 14 16  1
 17 14 17  1
 18 17 18  1
 19 17 22  1
 20 17 25  1
 21 18 19  1
 22 18 20  1
 23 18 21  1
 24 22 23  1
 25 22 24  1
 26 22 29  1
 27 25 26  1
 28 25 27  1
 29 25 28  1
 30 29 30  1
 31 29 31  1
 32 29 32  1
 33 32 33  1
 34 32 37  1
 35 32 41  1
 36 33 34  1
 37 33 35  1
 38 33 36  1
 39 37 38  1
 40 37 39  1
 41 37 40  1
 42 41 42  1
 43 41 43  1
 44 41 44  1
@<TRIPOS>SUBSTRUCTURE
  1  ALD  1  TEMP  0  ****  ****  0  ROOT

```

## 10. References

- (1) Larsen, A. H.; Mortensen, J. J.; Blomqvist, J.; Castelli, I. E.; Christensen, R.; Duřak, M.; Friis, J.; Groves, M. N.; Hammer, B.; Hargus, C.; Hermes, E. D.; Jennings, P. C.; Jensen, P. B.; Kermode, J.; Kitchin, J. R.; Kolsbjerg, E. L.; Kubal, J.; Kaasbjerg, K.; Lysgaard, S.; Maronsson, J. B.; Maxson, T.; Olsen, T.; Pastewka, L.; Peterson, A.; Rostgaard, C.; Schiøtz, J.; Schütt, O.; Strange, M.; Thygesen, K. S.; Vegge, T.; Vilhelmsen, L.; Walter, M.; Zeng, Z.; Jacobsen, K. W., The Atomic Simulation Environment—A Python library for working with atoms. *J. Phys.: Condens. Matter* **2017**, *29*, 273002.
- (2) Klein, C.; Sallai, J.; Jones, T. J.; Iacovella, C. R.; McCabe, C.; Cummings, P. T. A Hierarchical, Component Based Approach to Screening Properties of Soft Matter. In *Foundations of Molecular Modeling and Simulation. Molecular Modeling and Simulation (Applications and Perspectives)*; Snurr, R. Q., Adjiman, C. S., Kofke, D. A., Eds.; Springer, Singapore, **2016**; pp 79-92.

- (3) Heinz, H.; Lin, T.-J.; Kishore Mishra, R.; Emami, F. S. Thermodynamically consistent force fields for the assembly of inorganic, organic, and biological nanostructures: The INTERFACE force field. *Langmuir* **2013**, *29*, 1754-1765.
- (4) He, X.; Man, V. H.; Yang, W.; Lee, T.-S.; Wang, J. A fast and high-quality charge model for the next generation general AMBER force field. *J. Chem. Phys.* **2020**, *153*, 114502.
- (5) Vanquelef, E.; Simon, S.; Marquant, G.; Garcia, E.; Klimerak, G.; Delepine, J. C.; Cieplak, P.; Dupradeau, F.-Y., R.E.D. Server: a web service for deriving RESP and ESP charges and building force field libraries for new molecules and molecular fragments, *Nucl. Acids Res. (Web server issue)* **2011**, *39*, W511-W517.
- (6) Wang, F.; Becker, J.-P.; Cieplak, P.; Dupradeau, F.-Y., R.E.D. Python: Object oriented programming for Amber force fields, Université de Picardie - Jules Verne, Sanford Burnham Prebys Medical Discovery Institute, Nov. **2013**.
- (7) Dupradeau, F.-Y.; Pigache, A.; Zaffran, T.; Savineau, C.; Lelong, R.; Grivel, N.; Lelong, D.; Rosanski, W.; Cieplak, P., The R.E.D. tools: Advances in RESP and ESP charge derivation and force field library building, *Phys. Chem. Chem. Phys.* **2010**, *12*, 7821-7839.
- (8) Bayly, C. I.; Cieplak, P.; Cornell, W.; Kollman, P. A., A well-behaved electrostatic potential based method using charge restraints for deriving atomic charges: the RESP model. *J. Phys. Chem.* **1993**, *97*, 10269-10280.
- (9) Gaussian 16, Revision C.01, Frisch, M. J.; Trucks, G. W.; Schlegel, H. B.; Scuseria, G. E.; Robb, M. A.; Cheeseman, J. R.; Scalmani, G.; Barone, V.; Petersson, G. A.; Nakatsuji, H.; Li, X.; Caricato, M.; Marenich, A. V.; Bloino, J.; Janesko, B. G.; Gomperts, R.; Mennucci, B.; Hratchian, H. P.; Ortiz, J. V.; Izmaylov, A. F.; Sonnenberg, J. L.; Williams-Young, D.; Ding, F.; Lipparini, F.; Egidi, F.; Goings, J.; Peng, B.; Petrone, A.; Henderson, T.; Ranasinghe, D.; Zakrzewski, V. G.; Gao, J.; Rega, N.; Zheng, G.; Liang, W.; Hada, M.; Ehara, M.; Toyota, K.; Fukuda, R.; Hasegawa, J.; Ishida, M.; Nakajima, T.; Honda, Y.; Kitao, O.; Nakai, H.; Vreven, T.; Throssell, K.; Montgomery, J. A., Jr.; Peralta, J. E.; Ogliaro, F.; Bearpark, M. J.; Heyd, J. J.; Brothers, E. N.; Kudin, K. N.; Staroverov, V. N.; Keith, T. A.; Kobayashi, R.; Normand, J.; Raghavachari, K.; Rendell, A. P.; Burant, J. C.; Iyengar, S. S.; Tomasi, J.; Cossi, M.; Millam, J. M.; Klene, M.; Adamo, C.; Cammi, R.; Ochterski, J. W.; Martin, R. L.; Morokuma, K.; Farkas, O.; Foresman, J. B.; Fox, D. J. Gaussian, Inc., Wallingford CT, 2016.
- (10) Case, D. A.; Ben-Shalom, I. Y.; Brozell, S. R.; Cerutti, D. S.; Cheatham, I. T. E.; Cruzeiro, L. V. W. D.; Darden, T. A.; Duke, R. E.; Ghoreishi, D.; Gilson, M. K.; H. Gohlke, H.; Goetz, A. W.; Greene, D.; Harris, R.; Homeyer, N.; Izadi, S.; Kovalenko, A.; Kurtzman, T.; Lee, T. S.; LeGrand, S.; Li, P.; Lin, C.; Liu, J.; Luchko, T.; Luo, R.; Mermelstein, D. J.; Merz, K. M.; Miao, Y.; Monard, G.; Nguyen, C.; Nguyen, H.; Omelyan, I.; Onufriev, A.; Pan, F.; Qi, R.; Roe, D. R.; Roitberg, A.; Sagui, C.; Schott-Verdugo, S.; Shen, J.; Simmerling, C. L.; Smith, J.; Salomon-Ferrer, R.; Swails, J.; Walker, R. C.; Wang, J.; Wei, H.; Wolf, R. M.; Wu, X.; Xiao, L.; York D. M.; Kollman, P. A., *AMBER 2018*, University of California, San Francisco.
- (11) Salomon-Ferrer, R.; Goetz, A. W.; Poole, D.; Le Grand, S.; Walker, R. C., Routine microsecond molecular dynamics simulations with AMBER - Part II: Particle Mesh Ewald. *J. Chem. Theory Comput.* **2013**, *9*, 3878-3888.
- (12) Goetz, A. W.; Williamson, M. J.; Xu, D.; Poole, D.; Le Grand, S.; Walker, R. C., Routine microsecond molecular dynamics simulations with AMBER - Part I: Generalized Born. *J. Chem. Theory Comput.* **2012**, *8*, 1542-1555.
- (13) Le Grand, S.; Goetz, A. W.; Walker, R. C., SPFP: Speed without compromise - a mixed precision model for GPU accelerated molecular dynamics simulations. *Comp. Phys. Comm.* **2013**, *184*, 374-380.
- (14) Martínez, L.; Andrade, R.; Birgin, E. G.; Martínez, J. M., Packmol: A package for building initial configurations for molecular dynamics simulations. *J. Comput. Chem.* **2009**, *30*(13), 2157-2164.
- (15) Marson, D.; Posel, Z.; Posocco, P., Molecular features for probing small amphiphilic molecules with self-assembled monolayer-protected nanoparticles. *Langmuir* **2020**, *36*, 5671-5679.
- (16) You, W.; Tang, Z.; Chang, C. A. Potential mean force from umbrella sampling simulations: What can we learn and what is missed? *J. Chem. Theory Comput.* **2019**, 2433-2443.
- (17) Grossfield, A., "WHAM: an implementation of the weighted histogram analysis method", <http://membrane.urmc.rochester.edu/content/wham/>, version 2.0.11.

- (18) Ferrenberg, A. M.; Swendsen, R. H., Optimized Monte Carlo data analysis. *Phys. Rev. Lett.* **1989**, *63*, 1195–1198.
- (19) Kumar, S.; Bouzida, D.; Swendsen, R. H.; Kollman, P. A.; Rosenberg, J. P., THE weighted histogram analysis method for free-energy calculations on biomolecules. I. The method. *J. Comput. Chem.* **1992**, *13*, 1011-1021.
- (20) Kumar, S.; Rosenberg, J. M.; Bouzida, D.; Swendsen, R. H.; Kollman P. A. Multidimensional free-energy calculations using the weighted histogram analysis method. *J. Comput. Chem.* **1995**, *16*, 1399-1350.
- (21) Doudou, S.; Burton, N. A.; Henchman, R. H. Standard free energy of binding from a one-dimensional potential of mean force. *J. Chem. Theory Comput.* **2009**, *5*, 909-918.
- (22) Aho, N.; Groenhof, G.; Buslaev; P. Do all roads lead to Rome? Convergence issues in umbrella sampling simulations. *ChemRxiv* **2023**, doi: 10.26434/chemrxiv-2023-2pq1s.
- (23) Rad, N.; Sashuk, V., A light-gated regulation of the reaction site by a cucurbit[7]uril macrocycle. *Chem. Sci.* **2022**, *13*, 12440-12444.
- (24) Guven, Z. P.; Silva, P. H. J.; Luo, Z.; Cendrowska, U. B.; Gasbarri, M.; Jones, S. T.; Stellacci, F., Synthesis and characterization of amphiphilic gold nanoparticles. *JoVE* **2019**, e58872.
- (25) Sashuk, V.; Winkler, K.; Żywociński, A.; Wojciechowski, T.; Górecka, E.; Fiałkowski, M., Nanoparticles in a capillary trap: Dynamic self-assembly at fluid interfaces. *ACS Nano* **2013**, *7*, 8833-8839.
- (26) Szewczyk, M.; Sobczak, G.; Sashuk, V., Photoswitchable catalysis by a small swinging molecule confined on the surface of a colloidal particle. *ACS Catal.* **2018**, *8*, 2810-2814.
- (27) Martí-Centelles, V.; Piskorz, T. K.; Duarte, F., CageCavityCalc (C3): A computational tool for calculating and visualizing cavities in molecular cages. *ChemRxiv* **2024**, doi: 10.26434/chemrxiv-2024-fmlx0.
